# Supplementary material for: Text Mining and Natural Language Processing Approaches for Automatic Categorization of Lay Requests to Web-Based Expert Forums
Source: PubMed Central journal article supplement (PMC2762848; doi:10.2196/jmir.1123), 2009-07-22
Supplement: jmir_v11i3e25_app2.pdf [file jmir_v11i3e25_app2.pdf]

| TCC Training<br>(Link=>TRN Report,T)                                               | TCC Validation<br>(Link=>VAL Report,T)                                             | TCC Full Training<br>(Link=>FT Report,FT)                                           | Category<br>Number of Doc<br>(TRN,VAL,FT)<br>Restriction                               | Regression Model<br>Training<br>(Estimate,Chisq)                                                                                                                                                                                                                                                                                  | Regression Model<br>Full Training<br>(Estimate,Chisq)                                                                                                                                                                                                                                                                                                                                                                                                                  | Precision [%]<br>(p,f,b)                                | Recall [%]<br>(p,f,b)                                |
|------------------------------------------------------------------------------------|------------------------------------------------------------------------------------|-------------------------------------------------------------------------------------|----------------------------------------------------------------------------------------|-----------------------------------------------------------------------------------------------------------------------------------------------------------------------------------------------------------------------------------------------------------------------------------------------------------------------------------|------------------------------------------------------------------------------------------------------------------------------------------------------------------------------------------------------------------------------------------------------------------------------------------------------------------------------------------------------------------------------------------------------------------------------------------------------------------------|---------------------------------------------------------|------------------------------------------------------|
| 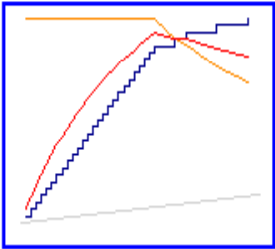  |   |   | 1. Abort<br>(30,10,40)<br>k_XMISC_30<br>Ginni_TRN: 95<br>Ginni_VAL: 95<br>Ginni_FT: 95 | Intercept(-6.11,-3.66)<br>k_30_1(31.69,2.90)<br>k_30_11(-5.81,-3.02)<br>k_20_1(-20.82,-2.34)<br>k_10_2(-4.14,-2.11)<br>k_5_37(-3.42,-2.93)                                                                                                                                                                                        | Intercept(-4.43,-4.90)<br>k_30_1(4.62,6.77)<br>k_10_18(-1.98,-1.41)<br>k_5_37(-1.55,-3.51)                                                                                                                                                                                                                                                                                                                                                                             | TRN:(100,100,68)<br>VAL:(100,91,91)<br>FT:(100,80,75)   | TRN:(87,87,100)<br>VAL:(50,100,10)<br>FT:(28,93,98)  |
|   |   |   | 1. Abort<br>(30,10,40)<br>k_AIC_40<br>Ginni_TRN: 91<br>Ginni_VAL: 87<br>Ginni_FT: 95   | Intercept(-592.99,-4.10)<br>k_40_1(5148.85,.)<br>k_30_11(-1107.1,.)<br>k_30_30(-1088.7,.)<br>k_20_1(-3593.0,.)<br>k_5_37(-325.29,-4.84)                                                                                                                                                                                           | Intercept(-4.43,-4.68)<br>k_40_1(4.69,6.64)<br>k_10_18(-2.14,-1.39)<br>k_5_37(-1.62,-3.52)                                                                                                                                                                                                                                                                                                                                                                             | TRN:(100,100,100)<br>VAL:(71,71,71)<br>FT:(100,80,68)   | TRN:(100,100,1)<br>VAL:(100,100,1)<br>FT:(28,98,100) |
|  |  |  | 1. Abort<br>(30,10,40)<br>svd_AIC_40<br>Ginni_TRN: 92<br>Ginni_VAL: 37<br>Ginni_FT: 93 | Intercept(-6125.2,-144.42)<br>s2(6544.01,3.99)<br>s3(-10521,-45.62)<br>s5(17455.5,.)<br>s9(26591.9,.)<br>s12(-19518,.)<br>s43(7684.73,.)<br>s46(-19990,.)<br>s59(11938.4,5.41)<br>s64(17114.7,.)<br>s167(-20415,-14.72)<br>s223(-3740.1,-4.94)<br>s289(2977.28,2.27)<br>s346(-5495.6,-4.43)<br>s360(6795.72,.)<br>s427(-7873.4,.) | Intercept(-1370.7,-0.78)<br>s1(1860.72,.)<br>s3(-1981.7,-0.46)<br>s5(1198.18,.)<br>s9(2461.75,.)<br>s15(1707.17,0.12)<br>s17(-3249.7,-0.15)<br>s26(2002.16,0.18)<br>s36(-1461.6,.)<br>s46(-2618.3,.)<br>s48(-1978.9,-0.06)<br>s55(2327.65,0.08)<br>s58(-1331.9,-0.06)<br>s124(-1062.6,.)<br>s147(2327.80,.)<br>s172(-2346.1,-0.07)<br>s198(1569.90,0.08)<br>s202(2194.99,0.11)<br>s304(-609.70,-0.07)<br>s346(-1101.2,-0.23)<br>s373(749.00,0.04)<br>s493(780.56,0.06) | TRN:(100,100,100)<br>VAL:(44,44,44)<br>FT:(100,100,100) | TRN:(87,100,10)<br>VAL:(40,40,40)<br>FT:(78,100,100) |

|                                                                                     |                                                                                     |                                                                                      |                                                                                            |                                             |                                                |                                                         |                                                     |
|-------------------------------------------------------------------------------------|-------------------------------------------------------------------------------------|--------------------------------------------------------------------------------------|--------------------------------------------------------------------------------------------|---------------------------------------------|------------------------------------------------|---------------------------------------------------------|-----------------------------------------------------|
| 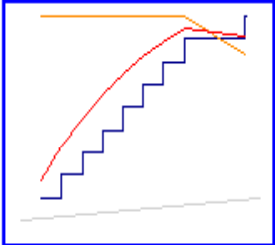   |    |    | 2. Ausschabung<br>(9,4,13)<br>k_XERROR_1<br>Ginni_TRN: 95<br>Ginni_VAL: 93<br>Ginni_FT: 95 | Intercept:(-6.79,-3.26)<br>k_1_2(7.25,2.92) | Intercept:(-6.98,-3.87)<br>k_1_2(9.44,3.46)    | TRN:(100,100,82)<br>VAL:(100,100,100)<br>FT:(100,87,87) | TRN:(89,89,100)<br>VAL:(100,100,1<br>FT:(69,100,100 |
|    |    |    | 2. Ausschabung<br>(9,4,13)<br>k_XERROR_20<br>Ginni_TRN: 0<br>Ginni_VAL: 0<br>Ginni_FT: 95  | Intercept:(-2.38,-6.82)                     | Intercept:(-26.02,-1.56)<br>k_20_2(22.48,1.57) | TRN:(8,8,8)<br>VAL:(11,11,11)<br>FT:(100,93,93)         | TRN:(100,100,1<br>VAL:(100,100,1<br>FT:(85,100,100  |
|  |  |  | 2. Ausschabung<br>(9,4,13)<br>k_XERROR_1<br>Ginni_TRN: 95<br>Ginni_VAL: 93<br>Ginni_FT: 95 | Intercept:(-6.79,-3.26)<br>k_1_2(7.25,2.92) | Intercept:(-6.98,-3.87)<br>k_1_2(9.44,3.46)    | TRN:(100,100,82)<br>VAL:(100,100,100)<br>FT:(100,87,87) | TRN:(89,89,100)<br>VAL:(100,100,1<br>FT:(69,100,100 |

|                                                                                     |                                                                                     |                                                                                      |                                                                                            |                                                                                                                                                                                                                                                                  |                                                                                                                                                                                                                                                                                                                                                  |                                                         |                                                        |
|-------------------------------------------------------------------------------------|-------------------------------------------------------------------------------------|--------------------------------------------------------------------------------------|--------------------------------------------------------------------------------------------|------------------------------------------------------------------------------------------------------------------------------------------------------------------------------------------------------------------------------------------------------------------|--------------------------------------------------------------------------------------------------------------------------------------------------------------------------------------------------------------------------------------------------------------------------------------------------------------------------------------------------|---------------------------------------------------------|--------------------------------------------------------|
| 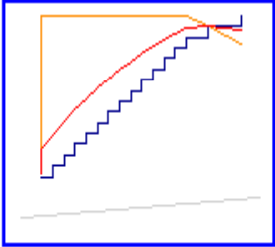   |    |    | 3. Clomifen<br>(19,7,26)<br>k_AIC_10<br>Ginni_TRN: 95<br>Ginni_VAL: 94<br>Ginni_FT: 95     | Intercept(-15.63,-1.69)<br>k_5_30(-10.70,-1.53)<br>k_1_3(40.83,1.60)<br>k_1_12(-19.97,-1.42)                                                                                                                                                                     | Intercept(-8.82,-3.70)<br>k_2_3(14.73,2.95)<br>k_1_36(-7.64,-1.37)                                                                                                                                                                                                                                                                               | TRN:(100,95,86)<br>VAL:(100,100,100)<br>FT:(100,96,88)  | TRN:(79,95,100)<br>VAL:(100,100,100)<br>FT:(81,92,100) |
|   |   |   | 3. Clomifen<br>(19,7,26)<br>svd_XMISC_40<br>Ginni_TRN: 94<br>Ginni_VAL: 71<br>Ginni_FT: 93 | Intercept(-386.62,-0.60)<br>s10(-1041.5,-0.24)<br>s18(1262.04,.)<br>s21(688.00,.)<br>s69(981.08,0.19)<br>s89(1794.53,0.71)<br>s103(-1039.4,-0.12)<br>s136(-1641.3,-0.21)<br>s259(-621.81,-0.54)<br>s321(696.41,0.44)<br>s369(354.24,0.15)<br>s482(-776.11,-0.29) | Intercept(-550.17,-1.53)<br>s10(-1325.0,-0.47)<br>s17(1011.35,.)<br>s21(2374.40,.)<br>s23(-1202.6,-0.56)<br>s24(1129.70,.)<br>s76(1977.89,1.36)<br>s83(1820.77,0.14)<br>s121(1536.97,.)<br>s166(-1880.1,-0.90)<br>s174(-1051.2,-0.46)<br>s223(2085.20,0.44)<br>s275(466.00,.)<br>s321(431.89,0.19)<br>s482(-595.69,-0.14)<br>s494(-944.98,-0.17) | TRN:(100,100,100)<br>VAL:(25,24,21)<br>FT:(100,100,100) | TRN:(79,100,100)<br>VAL:(43,71,86)<br>FT:(100,100,100) |
|  |  |  | 3. Clomifen<br>(19,7,26)<br>k_XERROR_1<br>Ginni_TRN: 95<br>Ginni_VAL: 91<br>Ginni_FT: 95   | Intercept(-16.55,-2.85)<br>k_1_3(16.91,2.92)<br>k_1_8(-29.72,-2.25)                                                                                                                                                                                              | Intercept(-9.39,-3.51)<br>k_1_3(16.01,3.16)<br>k_1_36(-6.30,-1.44)                                                                                                                                                                                                                                                                               | TRN:(100,100,88)<br>VAL:(100,86,86)<br>FT:(100,96,70)   | TRN:(79,89,100)<br>VAL:(43,86,86)<br>FT:(73,88,100)    |

|                                                                                     |                                                                                     |                                                                                      |                                                                                                    |                                                                                  |                                                                              |                                                                     |                                                                     |
|-------------------------------------------------------------------------------------|-------------------------------------------------------------------------------------|--------------------------------------------------------------------------------------|----------------------------------------------------------------------------------------------------|----------------------------------------------------------------------------------|------------------------------------------------------------------------------|---------------------------------------------------------------------|---------------------------------------------------------------------|
| 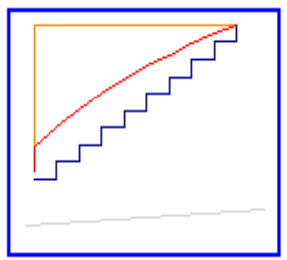   |    |    | <p>4. Eileiter<br/>(12,4,16)<br/>k_SBC_30<br/>Ginni_TRN: 95<br/>Ginni_VAL: 94<br/>Ginni_FT: 91</p> | <p>Intercept:(-15.29,-0.61)<br/>k_30_4(17.55,0.22)<br/>k_30_37(-11.39,-0.17)</p> | <p>Intercept:(-111.76,-9.28)<br/>k_30_4(227.92,.)<br/>k_30_37(-172.96,.)</p> | <p>TRN:(100,100,100)<br/>VAL:(100,100,100)<br/>FT:(100,100,100)</p> | <p>TRN:(100,100,100)<br/>VAL:(100,100,100)<br/>FT:(100,100,100)</p> |
|   |   |   | <p>4. Eileiter<br/>(12,4,16)<br/>k_SBC_30<br/>Ginni_TRN: 95<br/>Ginni_VAL: 94<br/>Ginni_FT: 91</p> | <p>Intercept:(-15.29,-0.61)<br/>k_30_4(17.55,0.22)<br/>k_30_37(-11.39,-0.17)</p> | <p>Intercept:(-111.76,-9.28)<br/>k_30_4(227.92,.)<br/>k_30_37(-172.96,.)</p> | <p>TRN:(100,100,100)<br/>VAL:(100,100,100)<br/>FT:(100,100,100)</p> | <p>TRN:(100,100,100)<br/>VAL:(100,100,100)<br/>FT:(100,100,100)</p> |
|  |  |  | <p>4. Eileiter<br/>(12,4,16)<br/>k_SBC_30<br/>Ginni_TRN: 95<br/>Ginni_VAL: 94<br/>Ginni_FT: 91</p> | <p>Intercept:(-15.29,-0.61)<br/>k_30_4(17.55,0.22)<br/>k_30_37(-11.39,-0.17)</p> | <p>Intercept:(-111.76,-9.28)<br/>k_30_4(227.92,.)<br/>k_30_37(-172.96,.)</p> | <p>TRN:(100,100,100)<br/>VAL:(100,100,100)<br/>FT:(100,100,100)</p> | <p>TRN:(100,100,100)<br/>VAL:(100,100,100)<br/>FT:(100,100,100)</p> |

|  |  |  |                                                                                                   |                                                                                                                                                                        |                                                                                                                                                                                                                    |                                                         |                                                     |
|--|--|--|---------------------------------------------------------------------------------------------------|------------------------------------------------------------------------------------------------------------------------------------------------------------------------|--------------------------------------------------------------------------------------------------------------------------------------------------------------------------------------------------------------------|---------------------------------------------------------|-----------------------------------------------------|
|  |  |  | 5. Eileiterprüfung<br>(14,5,19)<br>k_XERROR_1<br>Ginni_TRN: 94<br>Ginni_VAL: 94<br>Ginni_FT: 94   | Intercept:(-2.57,-2.79)<br>k_1_5(5.31,3.59)<br>k_1_37(-3.87,-2.90)                                                                                                     | Intercept:(-2.74,-3.18)<br>k_1_5(5.59,3.84)<br>k_1_37(-4.24,-3.23)                                                                                                                                                 | TRN:(100,87,87)<br>VAL:(100,100,100)<br>FT:(100,89,82)  | TRN:(57,93,93)<br>VAL:(100,100,1<br>FT:(63,89,95)   |
|  |  |  | 5. Eileiterprüfung<br>(14,5,19)<br>k_XERROR_1<br>Ginni_TRN: 94<br>Ginni_VAL: 94<br>Ginni_FT: 94   | Intercept:(-2.57,-2.79)<br>k_1_5(5.31,3.59)<br>k_1_37(-3.87,-2.90)                                                                                                     | Intercept:(-2.74,-3.18)<br>k_1_5(5.59,3.84)<br>k_1_37(-4.24,-3.23)                                                                                                                                                 | TRN:(100,87,87)<br>VAL:(100,100,100)<br>FT:(100,89,82)  | TRN:(57,93,93)<br>VAL:(100,100,1<br>FT:(63,89,95)   |
|  |  |  | 5. Eileiterprüfung<br>(14,5,19)<br>svd_XMISC_40<br>Ginni_TRN: 92<br>Ginni_VAL: 18<br>Ginni_FT: 93 | Intercept:(-2141.3,-29.13)<br>s8(-4730.9,-0.77)<br>s25(5838.32,2.07)<br>s74(-7129.5,..)<br>s170(-14406,..)<br>s182(10596.8,..)<br>s216(14265.3,..)<br>s225(-7982.8,..) | Intercept:(-206.25,-0.02)<br>s2(-531.53,-0.00)<br>s8(-831.30,..)<br>s25(566.78,0.02)<br>s39(-454.00,-0.01)<br>s170(-954.27,..)<br>s177(-602.13,-0.01)<br>s182(696.56,..)<br>s211(841.75,0.11)<br>s216(614.51,0.01) | TRN:(100,100,100)<br>VAL:(25,25,25)<br>FT:(100,100,100) | TRN:(100,100,1<br>VAL:(20,20,20)<br>FT:(95,100,100) |

|  |  |  |                                                                                                         |                                                                                                                                                                                                                                                                                                                                                                                                                                                                                                                                                                                                                                                                                                                                                                                           |                                                                                                                                                                                                                                                                                                                                                                                                                                                                                                                                                                                                                         |                                                                |                                                             |
|--|--|--|---------------------------------------------------------------------------------------------------------|-------------------------------------------------------------------------------------------------------------------------------------------------------------------------------------------------------------------------------------------------------------------------------------------------------------------------------------------------------------------------------------------------------------------------------------------------------------------------------------------------------------------------------------------------------------------------------------------------------------------------------------------------------------------------------------------------------------------------------------------------------------------------------------------|-------------------------------------------------------------------------------------------------------------------------------------------------------------------------------------------------------------------------------------------------------------------------------------------------------------------------------------------------------------------------------------------------------------------------------------------------------------------------------------------------------------------------------------------------------------------------------------------------------------------------|----------------------------------------------------------------|-------------------------------------------------------------|
|  |  |  | <p>5. Eisprung<br/>(60,21,81)<br/>pe_SBC_40<br/>Ginni_TRN: 94<br/>Ginni_VAL: 95<br/>Ginni_FT: 95</p>    | <p>Intercept:(8.00,-0.24)<br/>pC_6_1(2.24,6.35)<br/>pC_6_2(-9.13,-5.10)<br/>pC_6_3(11.44,3.52)<br/>pC_6_7(19.61,2.58)<br/>pC_20_3(-5.97,-4.19)<br/>pC_26_1(-0.61,-3.61)<br/>pC_28_2(5.98,3.14)<br/>pC_30_6(-11.85,-3.22)<br/>pC_35_5(12.24,2.52)</p>                                                                                                                                                                                                                                                                                                                                                                                                                                                                                                                                      | <p>Intercept:(10.00,-7.27)<br/>pC_6_1(2.40,7.12)<br/>pC_6_2(-10.10,-6.13)<br/>pC_6_3(11.81,4.09)<br/>pC_6_7(32.13,4.19)<br/>pC_14_7(33.60,3.07)<br/>pC_16_5(-10.62,-2.96)<br/>pC_20_3(-4.38,-3.69)<br/>pC_26_1(-0.60,-3.85)<br/>pC_28_2(4.52,2.68)</p>                                                                                                                                                                                                                                                                                                                                                                  | <p>TRN:(100,99,7,1)<br/>VAL:(100,90,68)<br/>FT:(100,97,72)</p> | <p>TRN:(99,92,95)<br/>VAL:(62,86,100)<br/>FT:(68,80,94)</p> |
|  |  |  | <p>6. Eisprung<br/>(60,21,81)<br/>svd_XMISC_40<br/>Ginni_TRN: 92<br/>Ginni_VAL: 50<br/>Ginni_FT: 93</p> | <p>Intercept:(-4645.9,-0.82)<br/>s2(15767.7,0.40)<br/>s11(18677.2,0.34)<br/>s18(-7433.3,-0.22)<br/>s26(-5812.2,..)<br/>s28(4780.62,0.12)<br/>s41(8484.42,..)<br/>s46(-9892.1,..)<br/>s53(6797.73,..)<br/>s60(5718.22,..)<br/>s64(-6337.7,..)<br/>s67(-7900.9,..)<br/>s88(12607.8,0.55)<br/>s106(12969.4,0.13)<br/>s139(-7976.6,..)<br/>s153(10098.5,..)<br/>s195(-12020,-0.08)<br/>s198(-10994,..)<br/>s207(-6519.8,..)<br/>s217(3706.37,0.06)<br/>s225(-10069,-0.16)<br/>s241(3438.19,0.08)<br/>s246(-3010.7,..)<br/>s259(3756.87,..)<br/>s307(-1697.5,..)<br/>s330(2359.89,..)<br/>s345(-4170.1,..)<br/>s387(4313.77,..)<br/>s397(3304.44,0.12)<br/>s398(-3325.8,-0.06)<br/>s407(-4227.8,..)<br/>s425(-4991.1,-0.21)<br/>s469(5789.33,..)<br/>s482(10461.4,..)<br/>s492(-4046.2,..)</p> | <p>Intercept:(-7.11,-9.06)<br/>s2(21.34,7.22)<br/>s8(-12.59,-4.18)<br/>s11(19.56,5.79)<br/>s14(-14.98,-4.97)<br/>s26(-11.52,-4.22)<br/>s40(9.12,2.85)<br/>s53(13.82,4.03)<br/>s64(-9.44,-2.99)<br/>s67(-13.01,-3.99)<br/>s88(12.68,3.57)<br/>s90(-9.19,-2.91)<br/>s106(11.65,3.40)<br/>s121(10.76,2.93)<br/>s139(-12.54,-3.63)<br/>s165(15.81,4.36)<br/>s198(-16.08,-4.01)<br/>s216(12.06,3.01)<br/>s225(-10.20,-2.91)<br/>s227(-0.64,-2.55)<br/>s241(6.28,3.94)<br/>s262(-5.23,-3.20)<br/>s330(7.03,3.83)<br/>s387(7.21,3.95)<br/>s394(-5.59,-3.22)<br/>s421(6.29,3.03)<br/>s425(-6.85,-3.31)<br/>s482(12.34,4.86)</p> | <p>TRN:(100,100,100)<br/>VAL:(38,38,38)<br/>FT:(100,78,67)</p> | <p>TRN:(100,100,1)<br/>VAL:(57,57,57)<br/>FT:(28,85,91)</p> |
|  |  |  | <p>6. Eisprung<br/>(60,21,81)<br/>k_SBC_30<br/>Ginni_TRN: 93<br/>Ginni_VAL: 94<br/>Ginni_FT: 94</p>     | <p>Intercept:(-2.35,-5.10)<br/>k_30_6(10.59,6.30)<br/>k_10_35(-1.09,-2.69)<br/>k_5_38(1.57,3.67)<br/>k_2_6(-8.13,-4.93)</p>                                                                                                                                                                                                                                                                                                                                                                                                                                                                                                                                                                                                                                                               | <p>Intercept:(-2.14,-4.80)<br/>k_30_6(11.20,7.07)<br/>k_30_26(-1.53,-2.76)<br/>k_30_31(-0.86,-2.57)<br/>k_5_12(-1.52,-2.65)<br/>k_5_38(1.72,3.63)<br/>k_2_6(-7.66,-4.91)</p>                                                                                                                                                                                                                                                                                                                                                                                                                                            | <p>TRN:(100,73,44)<br/>VAL:(100,86,86)<br/>FT:(100,87,55)</p>  | <p>TRN:(60,82,95)<br/>VAL:(62,90,90)<br/>FT:(63,75,95)</p>  |

|                                                                                     |                                                                                     |                                                                                      |                                                                                               |                                                                                   |                                                                                 |                                                      |                                                      |
|-------------------------------------------------------------------------------------|-------------------------------------------------------------------------------------|--------------------------------------------------------------------------------------|-----------------------------------------------------------------------------------------------|-----------------------------------------------------------------------------------|---------------------------------------------------------------------------------|------------------------------------------------------|------------------------------------------------------|
| 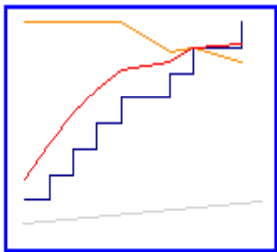   |    |    | 7. Endometriose<br>(8,3,11)<br>k_XERROR_10<br>Ginni_TRN: 94<br>Ginni_VAL: 91<br>Ginni_FT: 94  | Intercept:(-5.31,-4.09)<br>k_1_7(2.43,3.20)                                       | Intercept:(-5.47,-4.64)<br>k_1_7(2.35,4.14)                                     | TRN:(100,80,80)<br>VAL:(100,75,75)<br>FT:(100,83,73) | TRN:(63,100,10)<br>VAL:(33,100,10)<br>FT:(65,91,100) |
|   |   |   | 7. Endometriose<br>(8,3,11)<br>svd_XMISC_40<br>Ginni_TRN: 93<br>Ginni_VAL: 68<br>Ginni_FT: 90 | Intercept:(-9.46,-2.26)<br>s6(51.23,2.02)<br>s66(33.99,2.27)<br>s78(-53.26,-1.90) | Intercept:(-4.39,-4.84)<br>s6(16.30,3.04)<br>s66(26.54,2.90)<br>s84(26.74,2.68) | TRN:(100,86,53)<br>VAL:(23,23,23)<br>FT:(100,80,42)  | TRN:(63,75,100)<br>VAL:(100,100,1)<br>FT:(9,73,91)   |
|  |  |  | 7. Endometriose<br>(8,3,11)<br>k_XERROR_10<br>Ginni_TRN: 94<br>Ginni_VAL: 91<br>Ginni_FT: 94  | Intercept:(-5.31,-4.09)<br>k_1_7(2.43,3.20)                                       | Intercept:(-5.47,-4.64)<br>k_1_7(2.35,4.14)                                     | TRN:(100,80,80)<br>VAL:(100,75,75)<br>FT:(100,83,73) | TRN:(63,100,10)<br>VAL:(33,100,10)<br>FT:(65,91,100) |

|                                                                                     |                                                                                     |                                                                                      |                                                                                        |                                              |                                                |                                                          |                                                       |
|-------------------------------------------------------------------------------------|-------------------------------------------------------------------------------------|--------------------------------------------------------------------------------------|----------------------------------------------------------------------------------------|----------------------------------------------|------------------------------------------------|----------------------------------------------------------|-------------------------------------------------------|
| 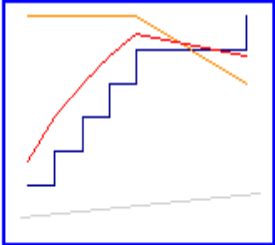   |    |    | 8. Ernährung<br>(8,3,9)<br>k_XMISC_1<br>Ginni_TRN: 95<br>Ginni_VAL: 92<br>Ginni_FT: 95 | Intercept:(-5.32,-2.03)<br>k_1_8(22.75,1.35) | Intercept:(-5.49,-2.08)<br>k_1_8(23.88,1.38)   | TRN:(100,100,67)<br>VAL:(100,100,100)<br>FT:(100,100,75) | TRN:(83,83,100)<br>VAL:(100,100,1)<br>FT:(89,89,100)  |
|   |   |   | 8. Ernährung<br>(8,3,9)<br>k_XERROR_10<br>Ginni_TRN: 0<br>Ginni_VAL: 0<br>Ginni_FT: 92 | Intercept:(-2.41,-5.66)                      | Intercept:(-26.42,-0.32)<br>k_2_8(113.27,0.27) | TRN:(8,8,8)<br>VAL:(12,12,12)<br>FT:(100,100,100)        | TRN:(100,100,1)<br>VAL:(100,100,1)<br>FT:(100,100,10) |
|  |  |  | 8. Ernährung<br>(8,3,9)<br>k_XMISC_1<br>Ginni_TRN: 95<br>Ginni_VAL: 92<br>Ginni_FT: 95 | Intercept:(-5.32,-2.03)<br>k_1_8(22.75,1.35) | Intercept:(-5.49,-2.08)<br>k_1_8(23.88,1.38)   | TRN:(100,100,67)<br>VAL:(100,100,100)<br>FT:(100,100,75) | TRN:(83,83,100)<br>VAL:(100,100,1)<br>FT:(89,89,100)  |



|                                                                                     |                                                                                     |                                                                                      |                                                                                                      |                                                                                                                                                                                                        |                                                                                                                                                                                                                    |                                                      |                                                    |
|-------------------------------------------------------------------------------------|-------------------------------------------------------------------------------------|--------------------------------------------------------------------------------------|------------------------------------------------------------------------------------------------------|--------------------------------------------------------------------------------------------------------------------------------------------------------------------------------------------------------|--------------------------------------------------------------------------------------------------------------------------------------------------------------------------------------------------------------------|------------------------------------------------------|----------------------------------------------------|
| 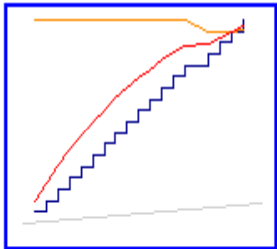   |    |    | 9. Gelbkörperschwäche<br>(18,7,25)<br>pc_SBC_40<br>Ginni_TRN: 95<br>Ginni_VAL: 94<br>Ginni_FT: 93    | Intercept(-16.10,-1.67)<br>pC_9_1(2.94,1.73)<br>pC_29_4(39.30,1.53)                                                                                                                                    | Intercept(-53.10,-0.80)<br>pC_4_4(280.91,0.75)<br>pC_9_1(11.17,0.78)<br>pC_18_2(-14.91,-0.96)                                                                                                                      | TRN:(100,95,95)<br>VAL:(100,88,88)<br>FT:(100,96,96) | TRN:(72,100,10<br>VAL:(86,100,10<br>FT:(92,100,100 |
|   |   |   | 9. Gelbkörperschwäche<br>(18,7,25)<br>svd_XMISC_40<br>Ginni_TRN: 93<br>Ginni_VAL: 82<br>Ginni_FT: 92 | Intercept(-583.73,-0.52)<br>s2(2149.29,.)<br>s17(891.25,.)<br>s31(-2177.4,.)<br>s55(-614.91,-0.04)<br>s64(-1799.9,.)<br>s75(-2467.7,.)<br>s152(-1634.8,-0.02)<br>s182(2807.59,0.04)<br>s193(2034.41,.) | Intercept(-3104.8,-4.19)<br>s2(12633.8,.)<br>s9(6668.95,.)<br>s14(8430.21,0.11)<br>s31(-6344.1,.)<br>s48(6756.92,.)<br>s60(-9964.4,.)<br>s75(-7458.2,.)<br>s101(-10482,.)<br>s110(6842.81,.)<br>s182(7787.80,0.09) | TRN:(100,95,95)<br>VAL:(45,45,30)<br>FT:(100,96,96)  | TRN:(83,100,10<br>VAL:(71,71,100<br>FT:(92,100,100 |
|  |  |  | 9. Gelbkörperschwäche<br>(18,7,25)<br>k_XERROR_1<br>Ginni_TRN: 95<br>Ginni_VAL: 94<br>Ginni_FT: 94   | Intercept(-4.31,-2.83)<br>k_1_9(8.47,3.65)<br>k_1_37(-2.67,-1.93)                                                                                                                                      | Intercept(-3.70,-4.01)<br>k_1_9(6.26,4.61)<br>k_1_38(-3.75,-2.55)                                                                                                                                                  | TRN:(100,94,64)<br>VAL:(100,88,88)<br>FT:(100,92,92) | TRN:(72,94,100<br>VAL:(71,100,10<br>FT:(64,96,96)  |

|  |  |  |                                                                                                   |                                               |                                               |                                                          |                                                    |
|--|--|--|---------------------------------------------------------------------------------------------------|-----------------------------------------------|-----------------------------------------------|----------------------------------------------------------|----------------------------------------------------|
|  |  |  | 10. Geschlechtsverkehr<br>(10,4,14)<br>k_AIC_1<br>Ginni_TRN: 92<br>Ginni_VAL: 94<br>Ginni_FT: 93  | Intercept(-41.80,-0.34)<br>k_1_10(71.09,0.31) | Intercept(-41.30,-1.00)<br>k_1_10(81.32,0.99) | TRN:(100,100,100)<br>VAL:(100,100,100)<br>FT:(100,93,93) | TRN:(100,100,1<br>VAL:(100,100,1<br>FT:(93,100,100 |
|  |  |  | 10. Geschlechtsverkehr<br>(10,4,14)<br>k_XERROR_1<br>Ginni_TRN: 0<br>Ginni_VAL: 0<br>Ginni_FT: 93 | Intercept(-2.35,-7.11)                        | Intercept(-41.30,-1.00)<br>k_1_10(81.32,0.99) | TRN:(9,9,9)<br>VAL:(10,10,10)<br>FT:(100,93,93)          | TRN:(100,100,1<br>VAL:(100,100,1<br>FT:(93,100,100 |
|  |  |  | 10. Geschlechtsverkehr<br>(10,4,14)<br>k_AIC_1<br>Ginni_TRN: 92<br>Ginni_VAL: 94<br>Ginni_FT: 93  | Intercept(-41.80,-0.34)<br>k_1_10(71.09,0.31) | Intercept(-41.30,-1.00)<br>k_1_10(81.32,0.99) | TRN:(100,100,100)<br>VAL:(100,100,100)<br>FT:(100,93,93) | TRN:(100,100,1<br>VAL:(100,100,1<br>FT:(93,100,100 |

|  |  |  |                                                                                              |                                                                                                               |                                                                                                                                                           |                                                          |                                                       |
|--|--|--|----------------------------------------------------------------------------------------------|---------------------------------------------------------------------------------------------------------------|-----------------------------------------------------------------------------------------------------------------------------------------------------------|----------------------------------------------------------|-------------------------------------------------------|
|  |  |  | 11. Habituell<br>(12,5,17)<br>k_XERROR_20<br>Ginni_TRN: 94<br>Ginni_VAL: 94<br>Ginni_FT: 95  | Intercept:(-7.04,-4.01)<br>k_20_11(3.88,3.51)                                                                 | Intercept:(-8.04,-4.20)<br>k_10_11(4.69,3.82)                                                                                                             | TRN:(100,100,55)<br>VAL:(100,100,100)<br>FT:(100,94,59)  | TRN:(83,83,100)<br>VAL:(100,100,1)<br>FT:(82,88,100)  |
|  |  |  | 11. Habituell<br>(12,5,17)<br>svd_XMISC_40<br>Ginni_TRN: 95<br>Ginni_VAL: 80<br>Ginni_FT: 95 | Intercept:(-31.07,-1.71)<br>s3:(-289.71,-1.73)<br>s21(115.53,1.65)<br>s125(78.68,1.99)<br>s164(-199.87,-1.67) | Intercept:(-35.23,-1.58)<br>s3:(-273.72,-1.54)<br>s20(-100.41,-1.59)<br>s23(-111.62,-1.59)<br>s49(89.60,1.59)<br>s170(-125.30,-1.55)<br>s196(181.68,1.58) | TRN:(100,100,75)<br>VAL:(50,50,28)<br>FT:(100,89,89)     | TRN:(83,92,100)<br>VAL:(60,60,100)<br>FT:(71,100,100) |
|  |  |  | 11. Habituell<br>(12,5,17)<br>k_AIC_1<br>Ginni_TRN: 95<br>Ginni_VAL: 93<br>Ginni_FT: 95      | Intercept:(-12.45,-1.42)<br>k_1_11(27.28,1.28)<br>k_1_38(-17.48,-1.20)                                        | Intercept:(-12.45,-1.42)<br>k_1_11(27.28,1.29)<br>k_1_38(-17.48,-1.20)                                                                                    | TRN:(100,100,86)<br>VAL:(100,100,100)<br>FT:(100,100,89) | TRN:(83,92,100)<br>VAL:(100,100,1)<br>FT:(82,94,100)  |

|  |  |  |                                                                                          |                                                                                                                                                                            |                                                                                                                                              |                                                        |                                                      |
|--|--|--|------------------------------------------------------------------------------------------|----------------------------------------------------------------------------------------------------------------------------------------------------------------------------|----------------------------------------------------------------------------------------------------------------------------------------------|--------------------------------------------------------|------------------------------------------------------|
|  |  |  | 12. Hormone<br>(27,9,36)<br>k_SBC_40<br>Ginni_TRN: 95<br>Ginni_VAL: 93<br>Ginni_FT: 95   | Intercept(-4.99,-1.63)<br>k_40_12(16.22,2.23)<br>k_20_35(-3.14,-2.12)<br>k_20_37(-54.00,-1.89)<br>k_10_37(47.60,1.79)                                                      | Intercept(-9.84,-2.61)<br>k_40_12(65.04,2.94)<br>k_30_33(6.55,2.91)<br>k_20_6(-3.81,-2.67)<br>k_20_12(-50.87,-2.83)<br>k_20_22(-10.88,-2.52) | TRN:(100,96,82)<br>VAL:(100,78,43)<br>FT:(100,95,86)   | TRN:(89,96,100)<br>VAL:(44,78,100)<br>FT:(81,97,100) |
|  |  |  | 12. Hormone<br>(27,9,36)<br>k_XMISC_10<br>Ginni_TRN: 91<br>Ginni_VAL: 62<br>Ginni_FT: 93 | Intercept(-621.29,-2.68)<br>k_10_6(-677.24,..)<br>k_10_12(2147.10,..)<br>k_10_18(-1189.6,-9.44)<br>k_10_38(-887.30,..)<br>k_5_30(-1151.6,-2.49)<br>k_5_35(-807.89,..)      | Intercept(-5.33,-4.57)<br>k_10_12(7.58,5.66)<br>k_10_21(-1.20,-1.77)<br>k_10_33(2.89,3.43)<br>k_2_6(-2.40,-2.99)<br>k_2_22(-3.88,-3.07)      | TRN:(100,100,100)<br>VAL:(63,60,60)<br>FT:(100,89,64)  | TRN:(96,100,10)<br>VAL:(56,67,67)<br>FT:(61,86,94)   |
|  |  |  | 12. Hormone<br>(27,9,36)<br>k_SBC_10<br>Ginni_TRN: 93<br>Ginni_VAL: 88<br>Ginni_FT: 93   | Intercept(-79.50,-0.40)<br>k_10_6(-60.50,-0.37)<br>k_10_12(197.41,0.34)<br>k_10_35(175.68,0.25)<br>k_10_38(-87.25,-0.32)<br>k_5_35(-259.34,-0.26)<br>k_2_30(-131.40,-0.33) | Intercept(-4.49,-4.72)<br>k_10_12(7.10,5.88)<br>k_10_33(3.45,4.07)<br>k_2_6(-2.08,-2.88)<br>k_2_22(-3.69,-3.13)                              | TRN:(100,100,100)<br>VAL:(100,78,78)<br>FT:(100,86,56) | TRN:(96,100,10)<br>VAL:(44,78,78)<br>FT:(58,83,94)   |

|                                                                                     |                                                                                     |                                                                                      |                                                                                                 |                                                                                                                                                                                                                  |                                                                                                                                                                                                                                                                                     |                                                         |                                                          |
|-------------------------------------------------------------------------------------|-------------------------------------------------------------------------------------|--------------------------------------------------------------------------------------|-------------------------------------------------------------------------------------------------|------------------------------------------------------------------------------------------------------------------------------------------------------------------------------------------------------------------|-------------------------------------------------------------------------------------------------------------------------------------------------------------------------------------------------------------------------------------------------------------------------------------|---------------------------------------------------------|----------------------------------------------------------|
| 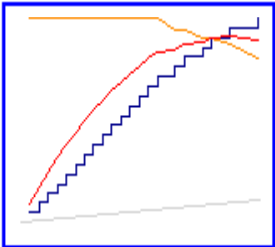   |    |    | 13. Insemination<br>(21,8,29)<br>k_XERROR_1<br>Ginni_TRN: 95<br>Ginni_VAL: 94<br>Ginni_FT: 95   | Intercept(-8.89,-3.90)<br>k_1_13(9.87,3.84)                                                                                                                                                                      | Intercept(-18.70,-2.06)<br>k_1_13(32.59,2.05)<br>k_1_37(-7.32,-1.79)                                                                                                                                                                                                                | TRN:(100,87,81)<br>VAL:(100,100,100)<br>FT:(100,97,97)  | TRN:(52,95,100)<br>VAL:(100,100,100)<br>FT:(86,100,100)  |
|   |   |   | 13. Insemination<br>(21,8,29)<br>svd_XMISC_40<br>Ginni_TRN: 92<br>Ginni_VAL: 85<br>Ginni_FT: 93 | Intercept(-1480.5,-3.95)<br>s5(-6389.6,-0.42)<br>s17(6562.10,..)<br>s58(5682.77,..)<br>s75(4781.96,1.85)<br>s89(-6250.4,..)<br>s115(5857.87,0.67)<br>s189(6472.06,..)<br>s481(-1364.9,-0.68)<br>s489(2461.29,..) | Intercept(-1046.8,-2.08)<br>s5(-2494.8,..)<br>s17(4487.26,..)<br>s20(2883.10,0.23)<br>s52(3362.30,0.20)<br>s53(-1554.3,-0.13)<br>s61(1964.15,..)<br>s70(-3101.8,-0.68)<br>s103(4008.38,..)<br>s110(4920.88,0.34)<br>s116(2923.71,0.32)<br>s174(1728.99,0.22)<br>s360(-1179.6,-0.45) | TRN:(100,100,100)<br>VAL:(58,57,57)<br>FT:(100,100,100) | TRN:(100,100,100)<br>VAL:(88,100,100)<br>FT:(86,100,100) |
|  |  |  | 13. Insemination<br>(21,8,29)<br>k_XERROR_1<br>Ginni_TRN: 95<br>Ginni_VAL: 94<br>Ginni_FT: 95   | Intercept(-8.89,-3.90)<br>k_1_13(9.87,3.84)                                                                                                                                                                      | Intercept(-18.70,-2.06)<br>k_1_13(32.59,2.05)<br>k_1_37(-7.32,-1.79)                                                                                                                                                                                                                | TRN:(100,87,81)<br>VAL:(100,100,100)<br>FT:(100,97,97)  | TRN:(52,95,100)<br>VAL:(100,100,100)<br>FT:(86,100,100)  |

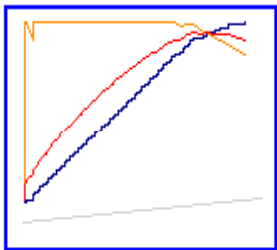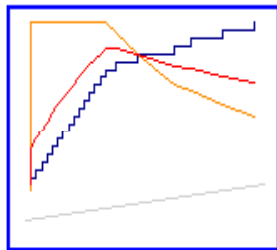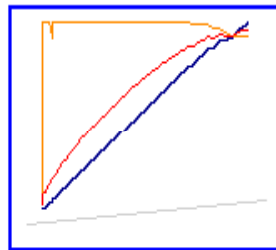

14. lvf  
(76,26,102)  
pe\_XERROR\_40  
Ginni\_TRN: 95  
Ginni\_VAL: 93  
Ginni\_FT: 95

Intercept(-25.75,-3.90)  
pC\_5\_7(-112.29,-3.36)  
pC\_7\_6(39.74,3.08)  
pC\_7\_7(-61.32,-2.94)  
pC\_14\_1(8.48,3.80)  
pC\_14\_2(-21.54,-3.99)  
pC\_16\_1(-1.77,-3.07)  
pC\_31\_2(-14.18,-3.56)  
pC\_32\_1(-1.30,-2.97)

Intercept(-23.66,-4.35)  
pC\_5\_7(-56.80,-3.36)  
pC\_14\_1(7.39,4.29)  
pC\_14\_2(-23.56,-4.09)  
pC\_14\_6(57.99,3.28)  
pC\_16\_1(-0.90,-2.83)  
pC\_17\_4(15.40,2.99)  
pC\_18\_4(10.42,2.43)  
pC\_24\_7(28.02,2.33)  
pC\_28\_5(28.65,2.28)  
pC\_31\_2(-11.85,-3.84)  
pC\_32\_1(-1.54,-3.42)  
pC\_32\_5(16.82,2.17)

TRN:(100,99,84)  
VAL:(100,95,54)  
FT:(100,93,93)

TRN:(84,92,100)  
VAL:(69,81,100)  
FT:(61,100,100)

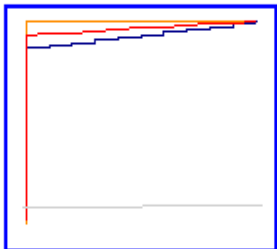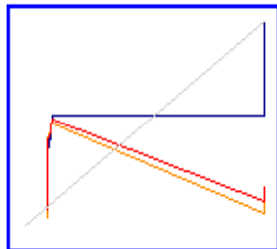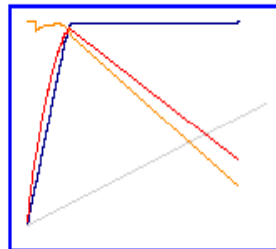

14. lvf  
(76,26,102)  
svd\_XMISC\_40  
Ginni\_TRN: 91  
Ginni\_VAL: 49  
Ginni\_FT: 94

Intercept(-4295.1,-2.40)  
s2(-9851.2,.) s4(-10832,.)  
s7(-12565,.)  
s8(11074.1,2.46)  
s15(-5500.1,-1.33)  
s43(2582.61,.)  
s45(7412.13,.)  
s56(-4708.5,-0.30)  
s77(-4359.2,-0.25)  
s93(-2688.8,.)  
s139(6442.54,.)  
s184(10770.1,0.47)

Intercept(-19.41,-6.35)  
s2(-47.31,-6.11)  
s4(-21.21,-4.24)  
s5(-22.92,-4.23)  
s6(-39.15,-5.19)  
s7(-34.03,-5.21)  
s8(42.90,5.55)  
s12(38.56,4.76)  
s22(-31.76,-5.36)  
s23(19.67,3.82)  
s45(40.76,5.10)  
s51(-24.15,-3.80)

TRN:(100,100,100)  
VAL:(50,50,50)  
FT:(100,95,94)

TRN:(100,100,100)  
VAL:(54,54,54)  
FT:(20,98,99)

|  |  |  |                                                                                         |                                                                  |                                                                  |                                                         |                                                      |
|--|--|--|-----------------------------------------------------------------------------------------|------------------------------------------------------------------|------------------------------------------------------------------|---------------------------------------------------------|------------------------------------------------------|
|  |  |  | 15. Kosten<br>(18,7,25)<br>k_XERROR_1<br>Ginni_TRN: 95<br>Ginni_VAL: 94<br>Ginni_FT: 95 | Intercept(-2.92,-1.40)<br>k_1_15(3.93,3.09)<br>k_1_33(5.87,1.18) | Intercept(-2.25,-1.31)<br>k_1_15(4.11,3.41)<br>k_1_33(6.37,1.46) | TRN:(100,100,90)<br>VAL:(100,100,100)<br>FT:(100,93,93) | TRN:(83,94,100)<br>VAL:(100,100,1<br>FT:(92,100,100) |
|  |  |  | 15. Kosten<br>(18,7,25)<br>k_XERROR_1<br>Ginni_TRN: 95<br>Ginni_VAL: 94<br>Ginni_FT: 95 | Intercept(-2.92,-1.40)<br>k_1_15(3.93,3.09)<br>k_1_33(5.87,1.18) | Intercept(-2.25,-1.31)<br>k_1_15(4.11,3.41)<br>k_1_33(6.37,1.46) | TRN:(100,100,90)<br>VAL:(100,100,100)<br>FT:(100,93,93) | TRN:(83,94,100)<br>VAL:(100,100,1<br>FT:(92,100,100) |
|  |  |  | 15. Kosten<br>(18,7,25)<br>k_XERROR_1<br>Ginni_TRN: 95<br>Ginni_VAL: 94<br>Ginni_FT: 95 | Intercept(-2.92,-1.40)<br>k_1_15(3.93,3.09)<br>k_1_33(5.87,1.18) | Intercept(-2.25,-1.31)<br>k_1_15(4.11,3.41)<br>k_1_33(6.37,1.46) | TRN:(100,100,90)<br>VAL:(100,100,100)<br>FT:(100,93,93) | TRN:(83,94,100)<br>VAL:(100,100,1<br>FT:(92,100,100) |

|                                                                                     |                                                                                     |                                                                                      |                                                                                              |                                                |                                              |                                                       |                                                      |
|-------------------------------------------------------------------------------------|-------------------------------------------------------------------------------------|--------------------------------------------------------------------------------------|----------------------------------------------------------------------------------------------|------------------------------------------------|----------------------------------------------|-------------------------------------------------------|------------------------------------------------------|
| 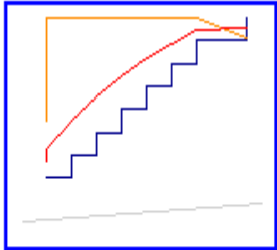   |    |    | 16. Kryotransfer<br>(9,4,13)<br>k_XERROR_1<br>Ginni_TRN: 95<br>Ginni_VAL: 92<br>Ginni_FT: 95 | Intercept:(-14.24,-1.13)<br>k_1_16(14.69,1.05) | Intercept:(-7.87,-3.20)<br>k_1_16(8.07,2.43) | TRN:(100,90,90)<br>VAL:(100,100,67)<br>FT:(100,92,68) | TRN:(89,100,10)<br>VAL:(75,75,100)<br>FT:(85,92,100) |
|   |   |   | 16. Kryotransfer<br>(9,4,13)<br>k_XERROR_10<br>Ginni_TRN: 0<br>Ginni_VAL: 0<br>Ginni_FT: 95  | Intercept:(-2.38,-6.82)                        | Intercept:(-7.81,-3.40)<br>k_2_16(7.45,2.61) | TRN:(8,8,8)<br>VAL:(11,11,11)<br>FT:(100,100,65)      | TRN:(100,100,1)<br>VAL:(100,100,1)<br>FT:(92,92,100) |
|  |  |  | 16. Kryotransfer<br>(9,4,13)<br>k_XERROR_1<br>Ginni_TRN: 95<br>Ginni_VAL: 92<br>Ginni_FT: 95 | Intercept:(-14.24,-1.13)<br>k_1_16(14.69,1.05) | Intercept:(-7.87,-3.20)<br>k_1_16(8.07,2.43) | TRN:(100,90,90)<br>VAL:(100,100,67)<br>FT:(100,92,68) | TRN:(89,100,10)<br>VAL:(75,75,100)<br>FT:(85,92,100) |



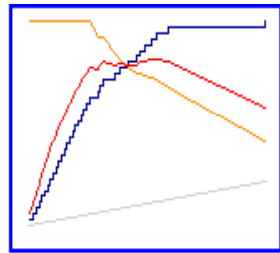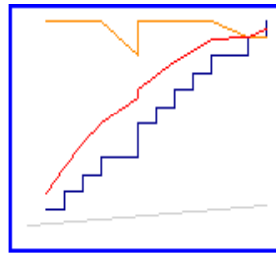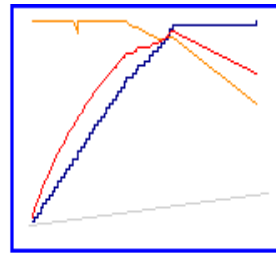

17. Medikamente  
(35,12,47)  
k\_SBC\_30  
Ginni\_TRN: 94  
Ginni\_VAL: 95  
Ginni\_FT: 95

Intercept(-3.98,-3.92)  
k\_30\_17(18.39,4.44)  
k\_20\_32(-3.12,-1.64)  
k\_5\_17(-14.42,-3.65)  
k\_5\_37(-1.79,-2.80)

Intercept(-6.91,-4.35)  
k\_30\_17(35.01,4.24)  
k\_20\_7(-8.69,-3.00)  
k\_20\_21(-6.00,-2.66)  
k\_10\_31(2.38,-2.72)  
k\_5\_17(-27.85,-3.93)  
k\_5\_25(-7.06,-3.46)

TRN:(100,72,68)  
VAL:(100,92,92)  
FT:(100,92,92)

TRN:(63,94,97)  
VAL:(83,100,10)  
FT:(72,98,98)

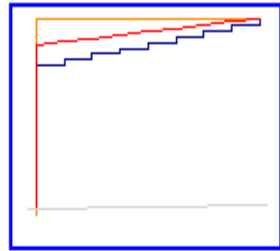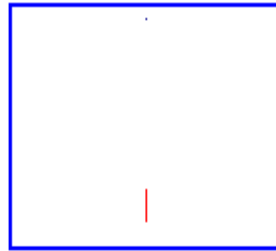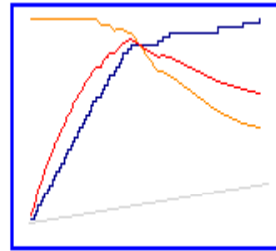

17. Medikamente  
(35,12,47)  
svd\_XMISC\_40  
Ginni\_TRN: 93  
Ginni\_VAL: 0  
Ginni\_FT: 95

Intercept(-2366.0,-52.27)  
s10(-4402.8,..)  
s13(4737.47,..)  
s20(-4138.3,..)  
s21(-7061.5,-10.96)  
s34(-6520.0,-3.03)  
s37(-7303.9,..)  
s55(5908.25,3.70)  
s64(-3306.4,-1.98)  
s110(-1478.1,-1.53)  
s142(-8348.5,..)  
s144(-4444.1,..)  
s176(2695.32,..)  
s179(10752.7,..)  
s232(-2126.8,..)  
s235(4011.42,9.81)  
s304(1078.80,..)  
s364(-1961.2,-4.05)  
s365(-4646.9,..)  
s370(2760.43,..)  
s391(-4744.0,..)  
s416(3597.65,7.23)

Intercept(-22.43,-4.38)  
s1(26.40,2.89)  
s5(27.62,4.07)  
s10(-44.03,-3.96)  
s11(29.77,3.35)  
s16(-24.35,-2.57)  
s18(44.31,3.99)  
s21(-30.43,-3.79)  
s48(20.95,3.11)  
s51(-42.50,-3.69)  
s66(26.26,3.37)  
s70(-27.78,-3.56)  
s123(36.30,3.27)  
s130(37.40,3.75)  
s144(-20.59,-2.83)  
s154(-21.90,-2.77)  
s161(27.33,3.35)  
s168(-23.85,-2.59)  
s179(43.26,3.91)  
s185(-33.59,-3.42)  
s200(-32.63,-3.52)  
s220(-32.43,-3.28)  
s229(-24.78,-3.93)  
s236(18.06,3.71)  
s258(18.73,3.90)  
s284(-22.60,-3.37)  
s303(-9.72,-2.55)  
s391(-20.30,-3.73)  
s405(12.85,2.92)  
s464(-32.43,-4.28)  
s495(-21.31,-3.89)

TRN:(100,100,100)  
VAL:(9,9,9)  
FT:(100,93,72)

TRN:(100,100,1)  
VAL:(100,100,1)  
FT:(62,87,94)

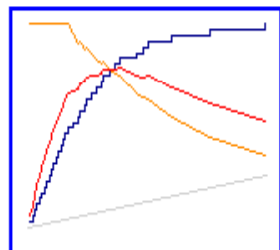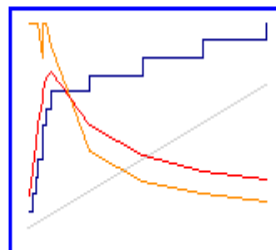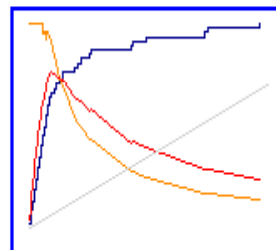

17. Medikamente  
(35,12,47)  
k\_SBC\_2  
Ginni\_TRN: 94  
Ginni\_VAL: 83  
Ginni\_FT: 90

Intercept(-1.55,-1.95)  
k\_2\_17(31.08,4.54)  
k\_2\_20(-7.09,-2.41)  
k\_2\_21(-3.21,-2.13)  
k\_2\_33(1.95,2.30)  
k\_2\_37(-2.71,-3.29)  
k\_1\_17(-22.86,-3.79)  
k\_1\_19(-7.82,-3.07)

Intercept(-3.40,-6.03)  
k\_2\_17(6.78,7.58)  
k\_2\_33(1.86,3.73)  
k\_1\_9(-3.18,-2.41)  
k\_1\_20(-2.70,-1.82)

TRN:(100,74,54)  
VAL:(100,89,89)  
FT:(100,91,43)

TRN:(49,83,94)  
VAL:(58,67,67)  
FT:(43,66,87)

|                                                                                     |                                                                                     |                                                                                      |                                                                                             |                                                                   |                                                               |                                                            |                                                            |
|-------------------------------------------------------------------------------------|-------------------------------------------------------------------------------------|--------------------------------------------------------------------------------------|---------------------------------------------------------------------------------------------|-------------------------------------------------------------------|---------------------------------------------------------------|------------------------------------------------------------|------------------------------------------------------------|
| 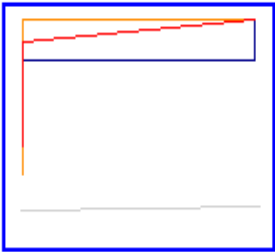   |    |    | 18. Mehrlinge<br>(5,2,7)<br>k_SBC_1<br>Ginni_TRN: 93<br>Ginni_VAL: 93<br>Ginni_FT: 92       | Intercept(-24.12,-0.09)<br>k_1_18(24.27,0.11)                     | Intercept(-67.57,-0.01)<br>k_1_18(63.83,0.01)                 | TRN:(100,100,100)<br>VAL:(100,100,100)<br>FT:(100,100,100) | TRN:(100,100,100)<br>VAL:(100,100,100)<br>FT:(100,100,100) |
|   |   |   | 18. Mehrlinge<br>(5,2,7)<br>k_XERROR_1<br>Ginni_TRN: 0<br>Ginni_VAL: 0<br>Ginni_FT: 0       | Intercept(-2.34,-5.00)                                            | Intercept(-2.30,-5.81)                                        | TRN:(9,9,9)<br>VAL:(10,10,10)<br>FT:(9,9,9)                | TRN:(100,100,100)<br>VAL:(100,100,100)<br>FT:(100,100,100) |
|  |  |  | 18. Mehrlinge<br>(5,2,7)<br>svd_XERROR_40<br>Ginni_TRN: 92<br>Ginni_VAL: 68<br>Ginni_FT: 93 | Intercept(-5.75,-2.83)<br>s65(-38.28,-2.48)<br>s144(-41.55,-2.48) | Intercept(-10.23,-2.30)<br>s50(76.31,2.01)<br>s51(65.37,2.11) | TRN:(100,80,45)<br>VAL:(100,100,100)<br>FT:(100,100,58)    | TRN:(40,80,100)<br>VAL:(50,50,50)<br>FT:(57,71,100)        |

|                                                                                     |                                                                                     |                                                                                      |                                                                                                |                                                                                                                                           |                                                                                                                                                             |                                                        |                                                      |
|-------------------------------------------------------------------------------------|-------------------------------------------------------------------------------------|--------------------------------------------------------------------------------------|------------------------------------------------------------------------------------------------|-------------------------------------------------------------------------------------------------------------------------------------------|-------------------------------------------------------------------------------------------------------------------------------------------------------------|--------------------------------------------------------|------------------------------------------------------|
| 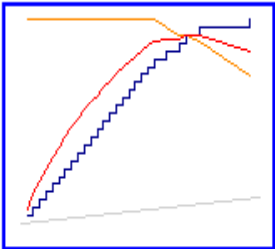   |    |    | 19. Menstruation<br>(26,9,35)<br>k_XERROR_10<br>Ginni_TRN: 95<br>Ginni_VAL: 95<br>Ginni_FT: 95 | Intercept(-2.86,-2.13)<br>k_10_19(33.05,2.89)<br>k_10_30(-10.70,-2.86)<br>k_5_26(-7.50,-2.36)<br>k_2_6(2.67,2.28)<br>k_1_19(-14.00,-2.17) | Intercept(-1.79,-2.10)<br>k_10_19(18.15,4.65)<br>k_10_30(-6.36,-3.42)<br>k_1_3(-6.41,-2.48)<br>k_1_26(-6.95,-3.49)                                          | TRN:(100,89,72)<br>VAL:(100,90,90)<br>FT:(100,94,65)   | TRN:(81,96,100)<br>VAL:(67,100,10)<br>FT:(74,91,100) |
|   |   |   | 19. Menstruation<br>(26,9,35)<br>k_SBC_30<br>Ginni_TRN: 92<br>Ginni_VAL: 90<br>Ginni_FT: 95    | Intercept(23.26,0.00)<br>k_30_19(487.75,.)<br>k_5_26(-219.25,-0.02)<br>k_5_31(-92.78,-0.12)<br>k_5_33(96.90,0.01)                         | Intercept(-2.56,-1.72)<br>k_30_19(47.69,1.60)<br>k_20_3(-13.27,-1.33)<br>k_20_10(13.18,1.50)<br>k_5_26(-21.08,-1.36)<br>k_1_31(-11.29,-1.65)                | TRN:(100,100,100)<br>VAL:(89,89,75)<br>FT:(100,97,85)  | TRN:(85,100,10)<br>VAL:(89,89,100)<br>FT:(74,97,100) |
|  |  |  | 19. Menstruation<br>(26,9,35)<br>k_XERROR_1<br>Ginni_TRN: 91<br>Ginni_VAL: 90<br>Ginni_FT: 93  | Intercept(-1.23,-1.75)<br>k_1_3(-4.03,-2.27)<br>k_1_6(1.15,2.00)<br>k_1_19(15.61,4.76)<br>k_1_26(-5.92,-2.99)<br>k_1_37(-3.21,-3.62)      | Intercept(-2.61,-3.64)<br>k_1_3(-5.47,-2.78)<br>k_1_6(1.16,2.17)<br>k_1_11(-4.63,-2.08)<br>k_1_19(15.17,5.85)<br>k_1_26(-3.79,-3.10)<br>k_1_37(-1.78,-2.51) | TRN:(100,87,51)<br>VAL:(100,100,100)<br>FT:(100,78,59) | TRN:(58,77,92)<br>VAL:(78,89,89)<br>FT:(37,80,94)    |

|  |  |  |                                                                                                   |                                                                                                                                                                                                                                                                       |                                                                                                                                                                                                                                                                                                                                                                                       |                                                         |                                                      |
|--|--|--|---------------------------------------------------------------------------------------------------|-----------------------------------------------------------------------------------------------------------------------------------------------------------------------------------------------------------------------------------------------------------------------|---------------------------------------------------------------------------------------------------------------------------------------------------------------------------------------------------------------------------------------------------------------------------------------------------------------------------------------------------------------------------------------|---------------------------------------------------------|------------------------------------------------------|
|  |  |  | 20. Naturheilkunde<br>(24,9,33)<br>k_SBC_10<br>Ginni_TRN: 95<br>Ginni_VAL: 94<br>Ginni_FT: 95     | Intercept:(-4.22,-4.86)<br>k_10_20(8.94,4.69)<br>k_2_35(-2.93,-2.11)                                                                                                                                                                                                  | Intercept:(-6.00,-5.26)<br>k_10_16(-5.03,-1.99)<br>k_10_20(10.42,5.12)<br>k_5_9(-3.41,-2.78)                                                                                                                                                                                                                                                                                          | TRN:(100,87,63)<br>VAL:(100,90,90)<br>FT:(100,94,73)    | TRN:(54,83,100)<br>VAL:(89,100,10)<br>FT:(30,91,100) |
|  |  |  | 20. Naturheilkunde<br>(24,9,33)<br>svd_XMISC_40<br>Ginni_TRN: 95<br>Ginni_VAL: 68<br>Ginni_FT: 93 | Intercept:(-21.24,-3.38)<br>s5(34.30,3.14)<br>s10(16.65,2.23)<br>s15(-55.59,-2.95)<br>s23(-89.17,-3.31)<br>s27(-87.62,-2.85)<br>s39(70.66,3.30)<br>s54(84.85,2.99)<br>s90(90.70,2.87)<br>s186(48.65,2.78)<br>s188(83.90,2.95)<br>s191(81.00,3.05)<br>s471(30.41,2.87) | Intercept:(-1527.7,-0.64)<br>s5(3775.22,0.06)<br>s8(2809.31,0.17)<br>s23(-4744.5,-0.21)<br>s27(-4083.9,.)<br>s41(2506.47,0.05)<br>s52(4110.50,0.19)<br>s107(-4491.9,-0.05)<br>s126(-3465.9,.)<br>s144(4116.73,.)<br>s157(-3037.0,-0.03)<br>s163(1708.20,.)<br>s188(5367.02,0.05)<br>s196(9625.33,.)<br>s216(3518.93,0.05)<br>s305(-1870.3,.)<br>s441(1942.10,0.18)<br>s449(1612.61,.) | TRN:(100,96,96)<br>VAL:(26,26,26)<br>FT:(100,100,100)   | TRN:(54,96,96)<br>VAL:(56,67,67)<br>FT:(100,100,10)  |
|  |  |  | 20. Naturheilkunde<br>(24,9,33)<br>k_XERROR_40<br>Ginni_TRN: 95<br>Ginni_VAL: 94<br>Ginni_FT: 95  | Intercept:(-8.05,-1.93)<br>k_40_20(32.27,1.54)<br>k_40_27(9.30,1.39)<br>k_20_35(-44.27,-1.38)<br>k_10_35(38.53,1.39)                                                                                                                                                  | Intercept:(-5.64,-5.75)<br>k_40_20(8.33,5.01)<br>k_1_9(-3.87,-2.00)                                                                                                                                                                                                                                                                                                                   | TRN:(100,100,83)<br>VAL:(100,100,100)<br>FT:(100,97,84) | TRN:(88,88,100)<br>VAL:(100,100,1)<br>FT:(64,91,97)  |

|  |  |  |                                                                                         |                                                                                                                                                                                               |                                                                                                                                                                                                                                                                  |                                                          |                                                     |
|--|--|--|-----------------------------------------------------------------------------------------|-----------------------------------------------------------------------------------------------------------------------------------------------------------------------------------------------|------------------------------------------------------------------------------------------------------------------------------------------------------------------------------------------------------------------------------------------------------------------|----------------------------------------------------------|-----------------------------------------------------|
|  |  |  | 21. Poo<br>(20,7,27)<br>k_XERROR_1<br>Ginni_TRN: 95<br>Ginni_VAL: 95<br>Ginni_FT: 95    | Intercept(-6.30,-5.04)<br>k_1_21(3.74,4.72)                                                                                                                                                   | Intercept(-6.81,-5.17)<br>k_1_21(4.04,5.05)                                                                                                                                                                                                                      | TRN:(100,100,74)<br>VAL:(100,100,100)<br>FT:(100,100,77) | TRN:(70,85,100)<br>VAL:(100,100,1<br>FT:(89,89,100) |
|  |  |  | 21. Poo<br>(20,7,27)<br>svd_XERROR_40<br>Ginni_TRN: 95<br>Ginni_VAL: 63<br>Ginni_FT: 95 | Intercept(-15.48,-3.17)<br>s19(-65.39,-2.94)<br>s68(71.59,3.00)<br>s103(36.43,2.64)<br>s147(46.25,2.45)<br>s166(93.72,3.09)<br>s199(-34.88,-2.55)<br>s282(-19.92,-2.83)<br>s431(-39.69,-2.64) | Intercept(-15.60,-3.26)<br>s11(32.30,2.60)<br>s19(-48.97,-3.38)<br>s68(42.66,2.87)<br>s102(-61.02,-2.72)<br>s199(-44.97,-2.71)<br>s282(-25.34,-2.95)<br>s344(-45.25,-2.84)<br>s380(-46.53,-2.83)<br>s412(-15.61,-2.59)<br>s447(-15.47,-2.41)<br>s452(30.39,2.94) | TRN:(100,82,71)<br>VAL:(27,27,14)<br>FT:(100,87,87)      | TRN:(35,90,100)<br>VAL:(43,43,100<br>FT:(48,96,96)  |
|  |  |  | 21. Poo<br>(20,7,27)<br>k_XERROR_1<br>Ginni_TRN: 95<br>Ginni_VAL: 95<br>Ginni_FT: 95    | Intercept(-6.30,-5.04)<br>k_1_21(3.74,4.72)                                                                                                                                                   | Intercept(-6.81,-5.17)<br>k_1_21(4.04,5.05)                                                                                                                                                                                                                      | TRN:(100,100,74)<br>VAL:(100,100,100)<br>FT:(100,100,77) | TRN:(70,85,100)<br>VAL:(100,100,1<br>FT:(89,89,100) |

|                                                                                     |                                                                                     |                                                                                      |                                                                                                      |                                                                                                                                                            |                                                                                                                                                                                                                                  |                                                                  |                                                                  |
|-------------------------------------------------------------------------------------|-------------------------------------------------------------------------------------|--------------------------------------------------------------------------------------|------------------------------------------------------------------------------------------------------|------------------------------------------------------------------------------------------------------------------------------------------------------------|----------------------------------------------------------------------------------------------------------------------------------------------------------------------------------------------------------------------------------|------------------------------------------------------------------|------------------------------------------------------------------|
| 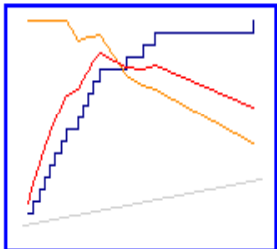   |    |    | <p>22. Pille<br/>(17,6,23)<br/>k_XMISC_1<br/>Ginni_TRN: 94<br/>Ginni_VAL: 95<br/>Ginni_FT: 94</p>    | <p>Intercept(-3.57,-3.54)<br/>k_1_22(6.48,4.39)<br/>k_1_37(-3.48,-2.55)</p>                                                                                | <p>Intercept(-3.48,-3.65)<br/>k_1_22(7.03,4.88)<br/>k_1_37(-4.31,-3.03)</p>                                                                                                                                                      | <p>TRN:(100,93,67)<br/>VAL:(100,100,100)<br/>FT:(100,90,65)</p>  | <p>TRN:(47,76,94)<br/>VAL:(100,100,100)<br/>FT:(43,83,96)</p>    |
|   |   |   | <p>22. Pille<br/>(17,6,23)<br/>svd_XMISC_40<br/>Ginni_TRN: 92<br/>Ginni_VAL: 55<br/>Ginni_FT: 92</p> | <p>Intercept(-4896.3,-178.59)<br/>s5(17325.2,7.53)<br/>s8(14848.4,.)<br/>s17(-21044,.)<br/>s199(8237.46,.)<br/>s399(-8647.3,.)<br/>s474(11452.7,21.42)</p> | <p>Intercept(-7290.7,-98.70)<br/>s5(19409.0,.)<br/>s8(21026.0,.)<br/>s17(-34573,.)<br/>s51(20313.9,33.76)<br/>s207(-13142,-16.35)<br/>s297(-8953.3,-4.36)<br/>s334(-7016.6,.)<br/>s388(7998.22,6.36)<br/>s429(11691.1,10.47)</p> | <p>TRN:(100,100,100)<br/>VAL:(36,36,36)<br/>FT:(100,100,100)</p> | <p>TRN:(100,100,100)<br/>VAL:(67,67,67)<br/>FT:(100,100,100)</p> |
|  |  |  | <p>22. Pille<br/>(17,6,23)<br/>k_XMISC_1<br/>Ginni_TRN: 94<br/>Ginni_VAL: 95<br/>Ginni_FT: 94</p>    | <p>Intercept(-3.57,-3.54)<br/>k_1_22(6.48,4.39)<br/>k_1_37(-3.48,-2.55)</p>                                                                                | <p>Intercept(-3.48,-3.65)<br/>k_1_22(7.03,4.88)<br/>k_1_37(-4.31,-3.03)</p>                                                                                                                                                      | <p>TRN:(100,93,67)<br/>VAL:(100,100,100)<br/>FT:(100,90,65)</p>  | <p>TRN:(47,76,94)<br/>VAL:(100,100,100)<br/>FT:(43,83,96)</p>    |

|                                                                                     |                                                                                     |                                                                                      |                                                                                                            |                                                 |                                                 |                                                            |                                                            |
|-------------------------------------------------------------------------------------|-------------------------------------------------------------------------------------|--------------------------------------------------------------------------------------|------------------------------------------------------------------------------------------------------------|-------------------------------------------------|-------------------------------------------------|------------------------------------------------------------|------------------------------------------------------------|
| 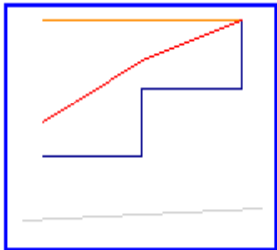   |    |    | 23.<br>Probleme_geschlechtsvek.<br>(3,2,5)<br>k_XMISC_10<br>Ginni_TRN: 95<br>Ginni_VAL: 90<br>Ginni_FT: 93 | Intercept:(-16.89,-0.05)<br>k_10_23(14.31,0.07) | Intercept:(-36.98,-0.01)<br>k_10_23(30.52,0.00) | TRN:(100,100,100)<br>VAL:(100,100,100)<br>FT:(100,100,100) | TRN:(67,100,100)<br>VAL:(100,100,100)<br>FT:(100,100,100)  |
|   |   |   | 23.<br>Probleme_geschlechtsvek.<br>(3,2,5)<br>k_XERROR_1<br>Ginni_TRN: 0<br>Ginni_VAL: 0<br>Ginni_FT: 0    | Intercept:(-2.51,-4.19)                         | Intercept:(-2.30,-4.91)                         | TRN:(8,8,8)<br>VAL:(13,13,13)<br>FT:(9,9,9)                | TRN:(100,100,100)<br>VAL:(100,100,100)<br>FT:(100,100,100) |
|  |  |  | 23.<br>Probleme_geschlechtsvek.<br>(3,2,5)<br>k_AIC_1<br>Ginni_TRN: 95<br>Ginni_VAL: 87<br>Ginni_FT: 91    | Intercept:(-17.48,-0.07)<br>k_1_23(17.45,0.09)  | Intercept:(-128.05,-3.75)<br>k_1_23(117.14,.)   | TRN:(100,100,100)<br>VAL:(100,100,100)<br>FT:(100,100,100) | TRN:(67,100,100)<br>VAL:(100,100,100)<br>FT:(100,100,100)  |

|                                                                                     |                                                                                     |                                                                                      |                                                                                             |                                                                        |                                                                     |                                                         |                                                     |
|-------------------------------------------------------------------------------------|-------------------------------------------------------------------------------------|--------------------------------------------------------------------------------------|---------------------------------------------------------------------------------------------|------------------------------------------------------------------------|---------------------------------------------------------------------|---------------------------------------------------------|-----------------------------------------------------|
| 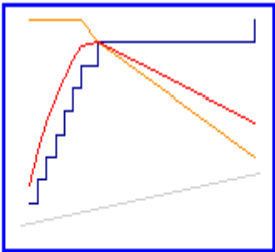   |    |    | 24. Schilddrüse<br>(9,4,13)<br>k_XERROR_1<br>Ginni_TRN: 93<br>Ginni_VAL: 93<br>Ginni_FT: 94 | Intercept(-6.36,-3.84)<br>k_1_24(4.17,2.73)                            | Intercept(-5.99,-4.83)<br>k_1_24(3.31,3.56)                         | TRN:(100,89,89)<br>VAL:(100,100,100)<br>FT:(100,100,86) | TRN:(78,89,89)<br>VAL:(100,100,1<br>FT:(85,85,92)   |
|   |   |   | 24. Schilddrüse<br>(9,4,13)<br>k_SBC_20<br>Ginni_TRN: 93<br>Ginni_VAL: 86<br>Ginni_FT: 95   | Intercept(-19.87,-0.01)<br>k_20_24(84.16,0.01)<br>k_5_37(-64.54,-0.00) | Intercept(-2.47,-1.59)<br>k_20_24(4.97,2.70)<br>k_5_37(-4.23,-1.95) | TRN:(100,100,100)<br>VAL:(80,80,80)<br>FT:(100,93,93)   | TRN:(100,100,1<br>VAL:(100,100,1<br>FT:(85,100,100) |
|  |  |  | 24. Schilddrüse<br>(9,4,13)<br>k_XERROR_1<br>Ginni_TRN: 93<br>Ginni_VAL: 93<br>Ginni_FT: 94 | Intercept(-6.36,-3.84)<br>k_1_24(4.17,2.73)                            | Intercept(-5.99,-4.83)<br>k_1_24(3.31,3.56)                         | TRN:(100,89,89)<br>VAL:(100,100,100)<br>FT:(100,100,86) | TRN:(78,89,89)<br>VAL:(100,100,1<br>FT:(85,85,92)   |



|                                                                                     |                                                                                     |                                                                                      |                                                                                                              |                                                                                                                                                                                                                                                                                                                                                                                                                               |                                                                                                                                                                                                                                                                                                                                                                                                                                                                                                                                                                       |                                                         |                                                      |
|-------------------------------------------------------------------------------------|-------------------------------------------------------------------------------------|--------------------------------------------------------------------------------------|--------------------------------------------------------------------------------------------------------------|-------------------------------------------------------------------------------------------------------------------------------------------------------------------------------------------------------------------------------------------------------------------------------------------------------------------------------------------------------------------------------------------------------------------------------|-----------------------------------------------------------------------------------------------------------------------------------------------------------------------------------------------------------------------------------------------------------------------------------------------------------------------------------------------------------------------------------------------------------------------------------------------------------------------------------------------------------------------------------------------------------------------|---------------------------------------------------------|------------------------------------------------------|
| 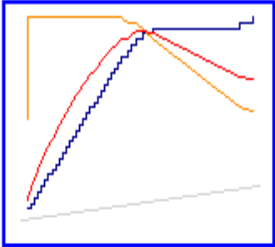   |    |    | 25.<br>Schwangerschaftssorgen<br>(36,13,49)<br>k_SBC_40<br>Ginni_TRN: 95<br>Ginni_VAL: 95<br>Ginni_FT: 95    | Intercept:(-5.10,-4.97)<br>k_40_25(8.13,4.84)<br>k_20_1(-1.98,-2.27)                                                                                                                                                                                                                                                                                                                                                          | Intercept:(-5.70,-5.62)<br>k_40_25(8.81,5.42)<br>k_1_1(-2.58,-3.10)                                                                                                                                                                                                                                                                                                                                                                                                                                                                                                   | TRN:(100,94,89)<br>VAL:(100,100,87)<br>FT:(100,96,90)   | TRN:(75,92,94)<br>VAL:(92,92,100)<br>FT:(82,92,96)   |
|    |    |    | 25.<br>Schwangerschaftssorgen<br>(36,13,49)<br>svd_AIC_40<br>Ginni_TRN: 93<br>Ginni_VAL: 33<br>Ginni_FT: 93  | Intercept:(-8005.7,-1.34)<br>s3(-12650,-1.48)<br>s9(26396.6,.)<br>s21(-11669,.)<br>s56(-16885,.)<br>s67(33051.4,0.34)<br>s78(18305.5,.)<br>s88(-23359,-2.14)<br>s106(22450.7,0.61)<br>s111(10459.8,.)<br>s134(15517.5,.)<br>s142(22563.1,0.71)<br>s278(-6937.3,-0.64)<br>s308(5209.30,0.11)<br>s311(-7267.0,.)<br>s323(-6992.2,-0.20)<br>s362(-12521,-0.99)<br>s412(-12181,-0.30)<br>s437(13462.6,1.03)<br>s490(19125.6,1.00) | Intercept:(-717.64,-0.27)<br>s3(-868.94,-0.17)<br>s9(2079.10,0.09)<br>s26(2437.30,0.08)<br>s40(-1024.3,.)<br>s56(-1981.8,-0.11)<br>s67(1915.07,0.13)<br>s78(1338.72,0.06)<br>s118(1637.80,0.06)<br>s137(-1866.8,.)<br>s142(2790.42,0.09)<br>s144(2144.02,0.13)<br>s170(1418.37,0.09)<br>s182(-2128.3,-0.08)<br>s192(1141.93,.)<br>s207(2678.95,0.45)<br>s216(-1414.5,-0.15)<br>s217(1580.81,.)<br>s302(-496.34,-0.10)<br>s308(913.21,.)<br>s358(-475.48,.)<br>s393(602.67,0.07)<br>s454(665.91,0.07)<br>s474(755.38,0.12)<br>s483(1212.43,0.13)<br>s490(1091.48,0.08) | TRN:(100,100,100)<br>VAL:(25,25,25)<br>FT:(100,100,100) | TRN:(83,100,10)<br>VAL:(38,38,38)<br>FT:(100,100,10) |
|  |  |  | 25.<br>Schwangerschaftssorgen<br>(36,13,49)<br>pe_XMISC_40<br>Ginni_TRN: 95<br>Ginni_VAL: 91<br>Ginni_FT: 95 | Intercept:(-27.10,-2.23)<br>pC_6_5(83.64,2.12)<br>pC_8_1(-0.90,-0.82)<br>pC_18_7(38.33,1.94)<br>pC_25_1(6.82,2.10)<br>pC_25_2(-18.64,-2.03)<br>pC_38_3(-37.36,-1.85)                                                                                                                                                                                                                                                          | Intercept:(-10.05,-5.12)<br>pC_1_1(-0.77,-2.75)<br>pC_20_7(14.92,2.53)<br>pC_25_1(2.56,4.63)<br>pC_25_2(-2.58,-2.46)                                                                                                                                                                                                                                                                                                                                                                                                                                                  | TRN:(100,100,88)<br>VAL:(100,79,79)<br>FT:(100,98,85)   | TRN:(83,97,100)<br>VAL:(23,85,85)<br>FT:(86,92,96)   |

| file:///t:/1M/himmel/neu_U6_U6/Report/modelle_best_ginni_precision_recall.html |  |  |                                                                                                                 | Google                                                                                                                                                                                                                             |                                                                                                                                                                                                                                                                                                                                                             |                                                        |                                                    |
|--------------------------------------------------------------------------------|--|--|-----------------------------------------------------------------------------------------------------------------|------------------------------------------------------------------------------------------------------------------------------------------------------------------------------------------------------------------------------------|-------------------------------------------------------------------------------------------------------------------------------------------------------------------------------------------------------------------------------------------------------------------------------------------------------------------------------------------------------------|--------------------------------------------------------|----------------------------------------------------|
|                                                                                |  |  | Schwangerschaftssymptome<br>(27,9,36)<br>k_XMISC_20<br>Ginni_TRN: 94<br>Ginni_VAL: 95<br>Ginni_FT: 94           | k_20_26(16.20,3.81)<br>k_10_19(-2.85,-2.84)<br>k_2_26(-12.56,-3.16)                                                                                                                                                                | k_20_26(13.52,4.48)<br>k_2_26(-10.59,-3.62)                                                                                                                                                                                                                                                                                                                 | VAL:(100,100,100)<br>FT:(100,94,58)                    | VAL:(100,100,100)<br>FT:(25,86,100)                |
|                                                                                |  |  | 26.<br>Schwangerschaftssymptome<br>(27,9,36)<br>svd_XERROR_40<br>Ginni_TRN: 94<br>Ginni_VAL: 51<br>Ginni_FT: 94 | Intercept(-11.33,-4.14)<br>s2(46.28,3.76)<br>s64(-39.94,-3.41)<br>s127(-32.17,-3.18)<br>s138(-20.82,-2.67)<br>s181(43.01,3.38)<br>s193(39.39,2.73)<br>s306(19.91,3.45)<br>s401(20.41,3.29)<br>s428(22.74,3.69)<br>s439(24.32,3.44) | Intercept(-10.31,-5.71)<br>s2(26.71,4.03)<br>s9(11.15,2.23)<br>s11(-28.24,-4.28)<br>s14(-39.10,-4.17)<br>s19(14.17,2.75)<br>s43(18.22,2.69)<br>s52(-36.90,-4.21)<br>s145(-18.32,-2.65)<br>s195(23.52,2.78)<br>s251(14.53,4.27)<br>s320(-10.39,-3.25)<br>s334(-10.42,-3.23)<br>s360(15.88,4.25)<br>s401(17.19,3.94)<br>s421(-9.86,-2.94)<br>s440(23.79,4.70) | TRN:(100,82,59)<br>VAL:(12,11,11)<br>FT:(100,94,55)    | TRN:(44,85,100)<br>VAL:(67,89,89)<br>FT:(61,83,94) |
|                                                                                |  |  | 26.<br>Schwangerschaftssymptome<br>(27,9,36)<br>k_XMISC_5<br>Ginni_TRN: 92<br>Ginni_VAL: 94<br>Ginni_FT: 92     | Intercept(-4.76,-8.39)<br>k_5_26(3.72,6.79)                                                                                                                                                                                        | Intercept(-5.41,-8.47)<br>k_5_26(11.92,4.04)<br>k_2_26(-8.20,-2.82)                                                                                                                                                                                                                                                                                         | TRN:(100,80,60)<br>VAL:(100,100,100)<br>FT:(100,84,63) | TRN:(22,74,93)<br>VAL:(89,89,89)<br>FT:(33,75,92)  |

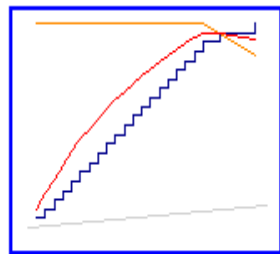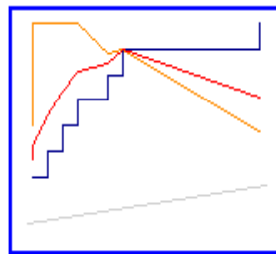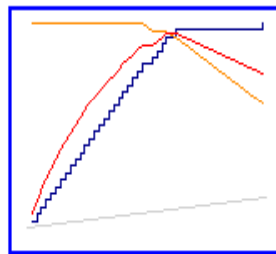

27. Schwangerschaftstest  
(22,8,30)  
k\_XERROR\_20  
Ginni\_TRN: 95  
Ginni\_VAL: 93  
Ginni\_FT: 95

Intercept(-13.13,-2.34)  
k\_20\_27(27.44,2.26)  
k\_5\_19(-15.58,-2.02)

Intercept(-4.64,-2.97)  
k\_20\_26(-2.80,-2.59)  
k\_20\_27(17.23,3.87)  
k\_20\_36(-2.94,-1.87)

TRN:(100,95,85)  
VAL:(100,88,47)  
FT:(100,94,94)

TRN:(91,95,100)  
VAL:(63,88,100)  
FT:(70,97,97)

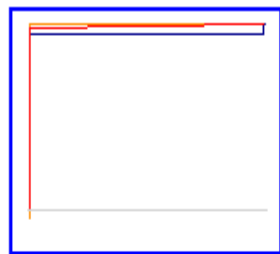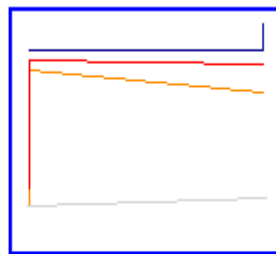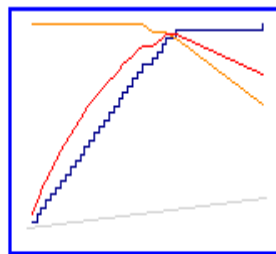

27. Schwangerschaftstest  
(22,8,30)  
k\_SBC\_40  
Ginni\_TRN: 91  
Ginni\_VAL: 89  
Ginni\_FT: 95

Intercept(-2070.5,-39.61)  
k\_40\_31(291.66,1.93)  
k\_20\_27(4192.19,..)  
k\_5\_19(-2293.9,..)

Intercept(-4.78,-3.09)  
k\_40\_36(-2.65,-1.85)  
k\_20\_26(-2.73,-2.47)  
k\_20\_27(17.23,3.86)

TRN:(100,100,100)  
VAL:(78,78,67)  
FT:(100,94,94)

TRN:(95,100,10)  
VAL:(88,88,100)  
FT:(70,97,97)

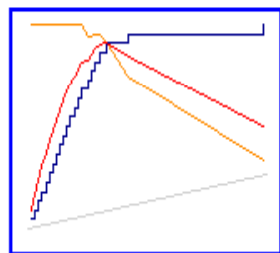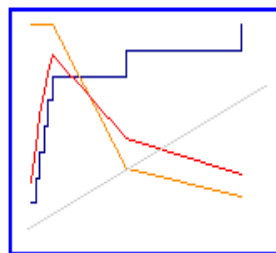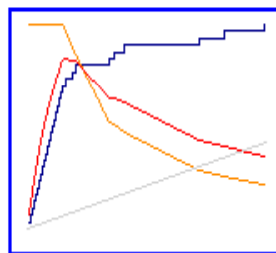

27. Schwangerschaftstest  
(22,8,30)  
k\_SBC\_2  
Ginni\_TRN: 94  
Ginni\_VAL: 85  
Ginni\_FT: 92

Intercept(-4.43,-3.03)  
k\_2\_8(-12.11,-2.02)  
k\_2\_27(13.58,4.43)  
k\_1\_33(3.69,2.47)

Intercept(-3.30,-4.68)  
k\_2\_37(-1.23,-2.53)  
k\_1\_27(10.94,5.97)

TRN:(100,91,75)  
VAL:(100,100,100)  
FT:(100,96,47)

TRN:(64,91,95)  
VAL:(63,75,75)  
FT:(70,73,90)

|  |  |  |                                                                                                              |                                                                                                                                                                                   |                                                                                                                                                                                                                                                   |                                                                |                                                                |
|--|--|--|--------------------------------------------------------------------------------------------------------------|-----------------------------------------------------------------------------------------------------------------------------------------------------------------------------------|---------------------------------------------------------------------------------------------------------------------------------------------------------------------------------------------------------------------------------------------------|----------------------------------------------------------------|----------------------------------------------------------------|
|  |  |  | <p>28. Spermogramm<br/>(42,15,57)<br/>pc_XERROR_40<br/>Ginni_TRN: 95<br/>Ginni_VAL: 94<br/>Ginni_FT: 95</p>  | <p>Intercept:(-22.07,-2.60)<br/>pC_5_3(41.10,2.44)<br/>pC_28_1(5.39,2.61)<br/>pC_28_2(-12.31,-1.99)<br/>pC_33_1(2.81,2.48)</p>                                                    | <p>Intercept:(-13.82,-4.56)<br/>pC_2_7(-23.41,-2.27)<br/>pC_3_4(10.32,2.56)<br/>pC_5_3(16.41,2.66)<br/>pC_19_2(-3.98,-2.49)<br/>pC_28_1(3.52,4.61)<br/>pC_33_1(1.20,3.00)</p>                                                                     | <p>TRN:(100,93,93)<br/>VAL:(100,88,75)<br/>FT:(100,92,89)</p>  | <p>TRN:(62,100,100)<br/>VAL:(47,93,100)<br/>FT:(81,98,100)</p> |
|  |  |  | <p>28. Spermogramm<br/>(42,15,57)<br/>pc_XMISC_40<br/>Ginni_TRN: 92<br/>Ginni_VAL: 85<br/>Ginni_FT: 95</p>   | <p>Intercept:(-2080.5,-3.19)<br/>pC_5_3(3927.66,2.40)<br/>pC_6_4(-3307.6,-3.21)<br/>pC_28_1(492.74,.)<br/>pC_28_2(-642.90,-1.46)<br/>pC_33_1(208.65,0.86)</p>                     | <p>Intercept:(-13.82,-4.56)<br/>pC_2_7(-23.41,-2.27)<br/>pC_3_4(10.32,2.56)<br/>pC_5_3(16.41,2.66)<br/>pC_19_2(-3.98,-2.49)<br/>pC_28_1(3.52,4.61)<br/>pC_33_1(1.20,3.00)</p>                                                                     | <p>TRN:(100,100,100)<br/>VAL:(86,82,82)<br/>FT:(100,92,89)</p> | <p>TRN:(100,100,100)<br/>VAL:(80,93,93)<br/>FT:(81,98,100)</p> |
|  |  |  | <p>28. Spermogramm<br/>(42,15,57)<br/>svd_XERROR_40<br/>Ginni_TRN: 95<br/>Ginni_VAL: 88<br/>Ginni_FT: 95</p> | <p>Intercept:(-13.23,-4.15)<br/>s2(-36.15,-3.94)<br/>s4(75.47,3.93)<br/>s19(24.97,2.50)<br/>s25(44.91,3.11)<br/>s32(-27.09,-2.88)<br/>s114(-28.98,-3.17)<br/>s164(35.41,2.62)</p> | <p>Intercept:(-0.03,-0.02)<br/>s1(-80.14,-3.85)<br/>s2(-51.22,-3.48)<br/>s4(95.32,3.77)<br/>s19(46.46,3.08)<br/>s71(-50.75,-3.32)<br/>s83(-27.31,-2.70)<br/>s105(48.94,3.53)<br/>s218(-39.66,-2.85)<br/>s241(13.97,2.87)<br/>s278(15.33,2.66)</p> | <p>TRN:(100,89,81)<br/>VAL:(100,80,80)<br/>FT:(100,92,89)</p>  | <p>TRN:(62,93,100)<br/>VAL:(40,80,80)<br/>FT:(79,96,98)</p>    |

|  |  |  |                                                                                                 |                                                                                                                                                                                                                                                                                 |                                                                                                                                                                                                                                                                                                                                                                                                                                |                                                      |                                                     |
|--|--|--|-------------------------------------------------------------------------------------------------|---------------------------------------------------------------------------------------------------------------------------------------------------------------------------------------------------------------------------------------------------------------------------------|--------------------------------------------------------------------------------------------------------------------------------------------------------------------------------------------------------------------------------------------------------------------------------------------------------------------------------------------------------------------------------------------------------------------------------|------------------------------------------------------|-----------------------------------------------------|
|  |  |  | 29. Stimulation<br>(30,10,40)<br>k_XERROR_10<br>Ginni_TRN: 95<br>Ginni_VAL: 93<br>Ginni_FT: 95  | Intercept(-4.47,-4.74)<br>k_10_16(-6.29,-3.26)<br>k_10_29(20.05,3.88)<br>k_1_29(-9.63,-2.87)<br>k_1_35(-4.97,-2.95)                                                                                                                                                             | Intercept(-4.45,-4.77)<br>k_10_10(-7.85,-2.25)<br>k_10_13(-4.48,-2.15)<br>k_10_16(-6.17,-3.21)<br>k_10_29(19.77,4.70)<br>k_2_34(-4.14,-3.15)<br>k_1_29(-10.01,-3.30)                                                                                                                                                                                                                                                           | TRN:(100,93,59)<br>VAL:(100,63,63)<br>FT:(100,94,79) | TRN:(43,90,100)<br>VAL:(40,100,10)<br>FT:(70,85,95) |
|  |  |  | 29. Stimulation<br>(30,10,40)<br>svd_XMISC_40<br>Ginni_TRN: 95<br>Ginni_VAL: 53<br>Ginni_FT: 95 | Intercept(-12.43,-3.94)<br>s4(-70.13,-3.55)<br>s9(-50.59,-3.36)<br>s20(22.87,2.53)<br>s43(-34.12,-3.15)<br>s151(-49.52,-3.36)<br>s198(-36.07,-2.88)<br>s309(-22.03,-3.22)<br>s323(-15.94,-3.00)<br>s346(16.76,3.04)<br>s408(17.39,2.56)<br>s427(18.91,2.71)<br>s459(17.26,2.76) | Intercept(-19.57,-3.25)<br>s4(-72.52,-3.00)<br>s9(-90.06,-3.05)<br>s13(25.04,2.76)<br>s43(-47.44,-2.98)<br>s47(61.57,2.71)<br>s128(32.59,2.80)<br>s149(-48.63,-2.81)<br>s151(-39.84,-3.13)<br>s193(66.39,3.06)<br>s202(-59.47,-2.74)<br>s203(92.30,2.82)<br>s225(-79.83,-3.02)<br>s226(-46.53,-2.79)<br>s227(94.48,3.20)<br>s346(21.59,2.82)<br>s364(31.70,2.95)<br>s385(-12.03,-2.32)<br>s466(28.54,3.07)<br>s492(39.46,3.25) | TRN:(100,94,94)<br>VAL:(14,12,12)<br>FT:(100,95,65)  | TRN:(43,97,97)<br>VAL:(50,100,10)<br>FT:(55,90,98)  |
|  |  |  | 29. Stimulation<br>(30,10,40)<br>k_XMISC_10<br>Ginni_TRN: 95<br>Ginni_VAL: 91<br>Ginni_FT: 95   | Intercept(-3.92,-4.07)<br>k_10_16(-5.81,-2.84)<br>k_10_29(23.30,3.87)<br>k_2_18(-10.21,-1.98)<br>k_1_29(-11.63,-2.88)<br>k_1_35(-5.13,-2.95)                                                                                                                                    | Intercept(-4.45,-4.77)<br>k_10_10(-7.85,-2.25)<br>k_10_13(-4.48,-2.15)<br>k_10_16(-6.17,-3.21)<br>k_10_29(19.77,4.70)<br>k_2_34(-4.14,-3.15)<br>k_1_29(-10.01,-3.30)                                                                                                                                                                                                                                                           | TRN:(100,90,75)<br>VAL:(100,80,80)<br>FT:(100,94,79) | TRN:(43,90,100)<br>VAL:(40,80,80)<br>FT:(70,85,95)  |

|  |  |  |                                                                                                     |                                                                                                                                     |                                                                                                                                                                              |                                                        |                                                     |
|--|--|--|-----------------------------------------------------------------------------------------------------|-------------------------------------------------------------------------------------------------------------------------------------|------------------------------------------------------------------------------------------------------------------------------------------------------------------------------|--------------------------------------------------------|-----------------------------------------------------|
|  |  |  | 30. Zwischenblutung<br>(10,4,14)<br>k_XERROR_1<br>Ginni_TRN: 94<br>Ginni_VAL: 94<br>Ginni_FT: 95    | Intercept(-7.72,-3.44)<br>k_1_30(5.45,3.12)                                                                                         | Intercept(-8.72,-3.60)<br>k_1_30(6.19,3.33)                                                                                                                                  | TRN:(100,90,63)<br>VAL:(100,100,100)<br>FT:(100,93,67) | TRN:(50,90,100)<br>VAL:(100,100,1<br>FT:(64,93,100) |
|  |  |  | 30. Zwischenblutung<br>(10,4,14)<br>svd_XERROR_40<br>Ginni_TRN: 94<br>Ginni_VAL: 58<br>Ginni_FT: 94 | Intercept(-35.30,-1.60)<br>s67(-124.04,-1.52)<br>s82(-211.49,-1.58)<br>s237(-64.68,-1.63)<br>s297(133.92,1.59)<br>s423(153.77,1.49) | Intercept(-10.07,-3.49)<br>s11(-52.17,-3.31)<br>s115(-42.12,-2.76)<br>s139(41.90,2.51)<br>s155(47.86,2.80)<br>s339(-11.67,-2.41)<br>s354(-16.01,-2.66)<br>s400(-25.15,-2.86) | TRN:(100,90,56)<br>VAL:(18,18,18)<br>FT:(100,92,52)    | TRN:(80,90,100)<br>VAL:(100,100,1<br>FT:(43,86,100) |
|  |  |  | 30. Zwischenblutung<br>(10,4,14)<br>k_XERROR_1<br>Ginni_TRN: 94<br>Ginni_VAL: 94<br>Ginni_FT: 95    | Intercept(-7.72,-3.44)<br>k_1_30(5.45,3.12)                                                                                         | Intercept(-8.72,-3.60)<br>k_1_30(6.19,3.33)                                                                                                                                  | TRN:(100,90,63)<br>VAL:(100,100,100)<br>FT:(100,93,67) | TRN:(50,90,100)<br>VAL:(100,100,1<br>FT:(64,93,100) |

|                                                                                     |                                                                                     |                                                                                      |                                                                                             |                                                                                                                                                                                                                                                                                                                                                                                                                                                                                                                                                                                                                                                                                                                        |                                                                                                                                                                                                                                                                                                                                                                                                                                                                                                                                                                                                                                                                                                                                                                                                                                                    |                                                      |                                                   |
|-------------------------------------------------------------------------------------|-------------------------------------------------------------------------------------|--------------------------------------------------------------------------------------|---------------------------------------------------------------------------------------------|------------------------------------------------------------------------------------------------------------------------------------------------------------------------------------------------------------------------------------------------------------------------------------------------------------------------------------------------------------------------------------------------------------------------------------------------------------------------------------------------------------------------------------------------------------------------------------------------------------------------------------------------------------------------------------------------------------------------|----------------------------------------------------------------------------------------------------------------------------------------------------------------------------------------------------------------------------------------------------------------------------------------------------------------------------------------------------------------------------------------------------------------------------------------------------------------------------------------------------------------------------------------------------------------------------------------------------------------------------------------------------------------------------------------------------------------------------------------------------------------------------------------------------------------------------------------------------|------------------------------------------------------|---------------------------------------------------|
| 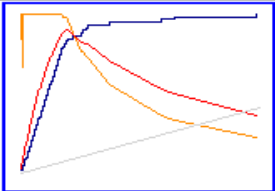   |    |    | 31. Zyklus<br>(59,20,79)<br>k_XERROR_30<br>Ginni_TRN: 94<br>Ginni_VAL: 94<br>Ginni_FT: 94   | Intercept:(-5.99,-6.41)<br>k_30_14(1.21,2.37)<br>k_30_31(13.20,6.12)<br>k_5_19(-5.09,-3.19)<br>k_5_20(8.91,-4.07)<br>k_2_28(1.29,3.57)<br>k_1_6(-2.01,-2.98)<br>k_1_31(-7.23,-4.15)<br>k_1_38(-1.51,-2.73)                                                                                                                                                                                                                                                                                                                                                                                                                                                                                                             | Intercept:(-6.06,-8.35)<br>k_30_13(2.23,3.22)<br>k_30_14(1.46,3.47)<br>k_30_25(1.54,2.81)<br>k_30_31(15.58,7.37)<br>k_10_20(6.77,2.57)<br>k_5_20(-14.15,-3.72)<br>k_2_28(1.28,4.59)<br>k_1_26(-2.97,-3.04)<br>k_1_31(-10.23,-5.85)                                                                                                                                                                                                                                                                                                                                                                                                                                                                                                                                                                                                                 | TRN:(100,96,72)<br>VAL:(100,94,50)<br>FT:(100,90,76) | TRN:(78,85,93)<br>VAL:(5,80,100)<br>FT:(19,87,94) |
|    |    |    | 31. Zyklus<br>(59,20,79)<br>svd_XERROR_40<br>Ginni_TRN: 94<br>Ginni_VAL: 69<br>Ginni_FT: 94 | Intercept:(-11.35,-6.28)<br>s2(24.18,5.20)<br>s4(14.50,2.54)<br>s5(21.62,4.58)<br>s9(-16.34,-2.62)<br>s10(29.04,4.34)<br>s36(35.50,4.21)<br>s51(19.57,3.64)<br>s60(-20.09,-3.27)<br>s65(-15.04,-3.04)<br>s68(21.94,3.52)<br>s73(-22.20,-3.21)<br>s90(-15.89,-2.50)<br>s95(-34.55,-4.39)<br>s101(18.67,3.18)<br>s111(-34.07,-4.21)<br>s135(26.84,4.27)<br>s146(30.55,4.50)<br>s156(-12.31,-2.04)<br>s232(-9.20,-3.31)<br>s235(13.23,3.80)<br>s266(-8.11,-2.93)<br>s284(9.34,2.92)<br>s301(10.92,3.77)<br>s302(8.93,2.99)<br>s304(15.19,3.54)<br>s329(-11.88,-3.63)<br>s337(-8.34,-2.63)<br>s383(16.13,4.38)<br>s420(-9.53,-2.82)<br>s440(-11.75,-3.19)<br>s451(-10.65,-3.29)<br>s478(-17.14,-4.31)<br>s482(-7.95,-2.65) | Intercept:(-10.14,-7.69)<br>s2(28.97,6.46)<br>s4(16.97,4.01)<br>s5(20.02,5.65)<br>s10(19.06,5.27)<br>s13(18.67,4.35)<br>s20(26.77,5.81)<br>s47(15.30,3.88)<br>s68(17.17,3.69)<br>s73(-18.99,-4.04)<br>s77(23.56,4.64)<br>s90(-15.15,-3.78)<br>s93(-19.94,-3.93)<br>s101(29.86,5.54)<br>s102(24.17,4.51)<br>s135(8.64,2.14)<br>s137(22.87,4.74)<br>s143(17.20,3.71)<br>s207(17.11,3.62)<br>s223(-21.14,-4.20)<br>s226(27.85,4.94)<br>s235(9.36,4.39)<br>s258(-9.02,-4.33)<br>s282(9.31,3.97)<br>s300(7.92,3.39)<br>s304(5.40,2.35)<br>s315(-4.81,-2.39)<br>s337(-8.29,-3.45)<br>s346(6.23,2.92)<br>s380(5.99,3.04)<br>s383(10.80,4.51)<br>s395(6.99,3.04)<br>s396(-6.84,-3.18)<br>s415(6.68,2.88)<br>s417(-8.88,-3.96)<br>s450(7.85,3.02)<br>s451(-13.11,-4.48)<br>s452(-8.62,-3.28)<br>s478(-9.42,-3.26)<br>s493(-9.99,-3.11)<br>s494(-8.59,-3.45) | TRN:(100,98,68)<br>VAL:(21,21,17)<br>FT:(100,88,65)  | TRN:(19,86,95)<br>VAL:(50,55,80)<br>FT:(38,84,92) |
|  |  |  | 31. Zyklus<br>(59,20,79)<br>k_XERROR_5<br>Ginni_TRN: 92<br>Ginni_VAL: 91<br>Ginni_FT: 92    | Intercept:(-4.76,-7.40)<br>k_5_20(-6.93,-4.61)<br>k_5_31(14.96,6.28)<br>k_5_37(-1.27,-3.93)<br>k_2_19(-4.06,-3.36)<br>k_1_6(-1.39,-3.01)<br>k_1_31(-10.07,-4.61)                                                                                                                                                                                                                                                                                                                                                                                                                                                                                                                                                       | Intercept:(-4.03,-6.33)<br>k_5_9(-2.28,-2.99)<br>k_5_20(-5.23,-4.42)<br>k_5_22(-2.43,-3.52)<br>k_5_31(14.38,7.03)<br>k_5_37(-0.83,-3.03)<br>k_1_6(-1.52,-3.66)<br>k_1_19(-4.00,-3.41)<br>k_1_31(-8.75,-4.70)                                                                                                                                                                                                                                                                                                                                                                                                                                                                                                                                                                                                                                       | TRN:(100,76,60)<br>VAL:(88,80,65)<br>FT:(100,86,47)  | TRN:(41,80,86)<br>VAL:(35,80,85)<br>FT:(5,76,94)  |

|  |  |  |                                                                                         |                                              |                                              |                                                        |                                                     |
|--|--|--|-----------------------------------------------------------------------------------------|----------------------------------------------|----------------------------------------------|--------------------------------------------------------|-----------------------------------------------------|
|  |  |  | 32. Zysten<br>(12,4,16)<br>k_XERROR_1<br>Ginni_TRN: 94<br>Ginni_VAL: 94<br>Ginni_FT: 95 | Intercept:(-7.60,-3.00)<br>k_1_32(8.37,2.49) | Intercept:(-8.40,-3.26)<br>k_1_32(9.90,2.96) | TRN:(100,91,67)<br>VAL:(100,100,100)<br>FT:(100,83,73) | TRN:(75,83,100)<br>VAL:(100,100,1<br>FT:(75,94,100) |
|  |  |  | 32. Zysten<br>(12,4,16)<br>k_XERROR_1<br>Ginni_TRN: 94<br>Ginni_VAL: 94<br>Ginni_FT: 95 | Intercept:(-7.60,-3.00)<br>k_1_32(8.37,2.49) | Intercept:(-8.40,-3.26)<br>k_1_32(9.90,2.96) | TRN:(100,91,67)<br>VAL:(100,100,100)<br>FT:(100,83,73) | TRN:(75,83,100)<br>VAL:(100,100,1<br>FT:(75,94,100) |
|  |  |  | 32. Zysten<br>(12,4,16)<br>k_XERROR_1<br>Ginni_TRN: 94<br>Ginni_VAL: 94<br>Ginni_FT: 95 | Intercept:(-7.60,-3.00)<br>k_1_32(8.37,2.49) | Intercept:(-8.40,-3.26)<br>k_1_32(9.90,2.96) | TRN:(100,91,67)<br>VAL:(100,100,100)<br>FT:(100,83,73) | TRN:(75,83,100)<br>VAL:(100,100,1<br>FT:(75,94,100) |



|                                                                                     |                                                                                     |                                                                                      |                                                                                                           |                                                                                                                                                                                                                                                                                                                                                                                    |                                                                                                                                                                                                                                                                                                                                                    |                                                       |                                                    |
|-------------------------------------------------------------------------------------|-------------------------------------------------------------------------------------|--------------------------------------------------------------------------------------|-----------------------------------------------------------------------------------------------------------|------------------------------------------------------------------------------------------------------------------------------------------------------------------------------------------------------------------------------------------------------------------------------------------------------------------------------------------------------------------------------------|----------------------------------------------------------------------------------------------------------------------------------------------------------------------------------------------------------------------------------------------------------------------------------------------------------------------------------------------------|-------------------------------------------------------|----------------------------------------------------|
| 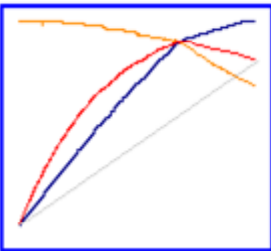   |    |    | 33. A, Allgemeine Fragen<br>(399,134,533)<br>k_XMISC_40<br>Ginni_TRN: 71<br>Ginni_VAL: 70<br>Ginni_FT: 71 | Intercept(3,14,8.38)<br>k_40_33(23.39,8.25)<br>k_40_37(1.75,7.03)<br>k_30_33(-11.92,-4.51)<br>k_30_35(3.08,8.02)<br>k_20_36(0.93,3.86)<br>k_10_34(1.09,3.57)<br>k_5_33(-4.22,-4.86)<br>k_5_38(1.95,6.30)<br>k_2_5(1.46,4.64)                                                                                                                                                       | Intercept(3,11,9.65)<br>k_40_33(21.83,8.83)<br>k_40_37(1.79,7.54)<br>k_30_16(0.97,3.21)<br>k_30_32(-2.39,-2.56)<br>k_30_33(-9.27,-4.02)<br>k_30_35(3.05,9.11)<br>k_30_36(0.92,4.12)<br>k_20_38(1.54,6.30)<br>k_5_5(1.44,5.71)<br>k_5_12(0.79,2.74)<br>k_5_32(3.57,3.21)<br>k_5_33(-4.75,-5.88)<br>k_1_34(1.85,4.60)                                | TRN:(100,90,90)<br>VAL:(100,92,92)<br>FT:(100,88,88)  | TRN:(27,90,90)<br>VAL:(32,84,84)<br>FT:(24,92,92)  |
|   |   |   | 33. A, Allgemeine Fragen<br>(399,134,533)<br>svd_SBC_40<br>Ginni_TRN: 50<br>Ginni_VAL: 29<br>Ginni_FT: 63 | Intercept(2,16,0.66)<br>s2(6011,27,1.20)<br>s3(10615,7,3.11)<br>s4(-8382,8,-0.43)<br>s5(18902,9,.)<br>s8(10797,5,.)<br>s10(26576,8,.)<br>s11(19521,5,.)<br>s12(11523,4,0.63)<br>s13(24870,5,1.59)<br>s15(-28355,-1.92)<br>s18(-27690,.)<br>s20(-12688,-0.89)<br>s22(-12115,.)<br>s34(18914,4,0.85)<br>s35(20354,2,0.69)<br>s37(44843,7,0.85)<br>s18(-27690,.)<br>s20(-12688,-0.89) | Intercept(0,01,0.10)<br>s3(5,40,3.54)<br>s5(2,75,3.55)<br>s6(-2,54,2.63)<br>s9(3,28,3.48)<br>s10(3,59,3.51)<br>s13(3,34,3.13)<br>s15(-4,29,-3.97)<br>s18(-5,46,-5.19)<br>s23(2,49,2.39)<br>s24(-3,20,-3.17)<br>s38(-4,60,-4.02)<br>s64(-3,33,-2.96)<br>s70(3,09,2.67)<br>s96(5,16,4.31)<br>s155(4,06,3.20)<br>s18(-4,60,-4.02)<br>s64(-3,33,-2.96) | TRN:(100,100,100)<br>VAL:(64,54,64)<br>FT:(100,63,74) | TRN:(99,100,10)<br>VAL:(67,100,67)<br>FT:(1,95,73) |
|  |  |  | 33. A, Allgemeine Fragen<br>(399,134,533)<br>k_SBC_1<br>Ginni_TRN: 64<br>Ginni_VAL: 63<br>Ginni_FT: 64    | Intercept(2,45,11.28)<br>k_1_10(1,08,2.46)<br>k_1_12(0,82,3.72)<br>k_1_33(2,66,11.49)                                                                                                                                                                                                                                                                                              | Intercept(2,44,13.03)<br>k_1_10(1,04,2.74)<br>k_1_12(0,91,4.70)<br>k_1_20(-1,21,-3.33)<br>k_1_33(2,61,13.04)                                                                                                                                                                                                                                       | TRN:(100,70,78)<br>VAL:(100,64,79)<br>FT:(100,69,80)  | TRN:(9,87,72)<br>VAL:(6,98,70)<br>FT:(5,88,66)     |

|                                                                                     |                                                                                     |                                                                                      |                                                                                                                              |                                                                                                                                                                                                                                                                                                                                                                                                                                                                                                                                                        |                                                                                                                                                                                                                                                                                                                                                                                                                                                                                                                                                                                                                                                                             |                                                               |                                                            |
|-------------------------------------------------------------------------------------|-------------------------------------------------------------------------------------|--------------------------------------------------------------------------------------|------------------------------------------------------------------------------------------------------------------------------|--------------------------------------------------------------------------------------------------------------------------------------------------------------------------------------------------------------------------------------------------------------------------------------------------------------------------------------------------------------------------------------------------------------------------------------------------------------------------------------------------------------------------------------------------------|-----------------------------------------------------------------------------------------------------------------------------------------------------------------------------------------------------------------------------------------------------------------------------------------------------------------------------------------------------------------------------------------------------------------------------------------------------------------------------------------------------------------------------------------------------------------------------------------------------------------------------------------------------------------------------|---------------------------------------------------------------|------------------------------------------------------------|
| 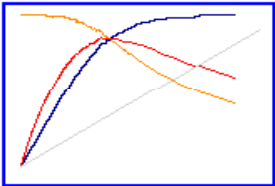   |    |    | <p>34. D,<br/>Derzeitigebehandlung<br/>(248,83,331)<br/>pe_XMISC_40<br/>Ginni_TRN: 80<br/>Ginni_VAL: 78<br/>Ginni_FT: 80</p> | <p>Intercept:(-1.77,-9.66)<br/>pC_2_5(3.46,2.29)<br/>pC_8_6(-2.78,-2.74)<br/>pC_11_7(7.96,2.73)<br/>pC_15_6(4.75,0.00)<br/>pC_15_3(-3.57,-2.59)<br/>pC_16_1(-0.14,-2.63)<br/>pC_18_2(1.16,3.21)<br/>pC_19_1(-0.21,-3.18)<br/>pC_24_5(9.66,4.20)<br/>pC_25_2(0.97,2.69)<br/>pC_26_1(-0.35,-5.52)<br/>pC_26_7(-8.30,-3.01)<br/>pC_29_1(-0.29,-3.84)<br/>pC_34_1(2.18,11.87)<br/>pC_34_2(-4.64,-9.08)<br/>pC_34_3(6.78,6.46)<br/>pC_34_7(10.24,3.23)<br/>pC_35_1(-0.59,-6.43)<br/>pC_36_6(5.48,2.67)<br/>pC_37_1(-0.63,-6.67)<br/>pC_37_7(14.68,2.48)</p> | <p>Intercept:(-1.90,-11.58)<br/>pC_8_1(0.11,2.29)<br/>pC_8_6(-2.38,-2.65)<br/>pC_9_3(3.24,4.24)<br/>pC_10_1(0.20,0.06)<br/>pC_10_4(2.74,2.80)<br/>pC_13_6(2.50,1.84)<br/>pC_14_3(4.30,3.38)<br/>pC_19_1(-0.16,-2.44)<br/>pC_22_7(6.81,2.96)<br/>pC_23_3(-3.18,-4.13)<br/>pC_24_5(8.79,4.12)<br/>pC_25_6(-4.90,-2.85)<br/>pC_26_1(-0.34,-5.60)<br/>pC_26_5(5.22,3.90)<br/>pC_26_7(-8.37,-3.49)<br/>pC_27_7(-3.43,-2.37)<br/>pC_28_5(9.12,2.74)<br/>pC_29_1(-0.18,-2.78)<br/>pC_31_1(0.29,4.11)<br/>pC_34_1(2.27,13.40)<br/>pC_34_2(-5.19,-10.99)<br/>pC_34_3(6.92,7.43)<br/>pC_34_7(12.07,4.21)<br/>pC_35_1(-0.54,-6.44)<br/>pC_36_6(4.86,2.74)<br/>pC_37_1(-0.67,-8.65)</p> | <p>TRN:(100,89,81)<br/>VAL:(100,85,71)<br/>FT:(100,89,89)</p> | <p>TRN:(28,81,88)<br/>VAL:(22,72,86)<br/>FT:(19,85,85)</p> |
|   |   |   | <p>34. D,<br/>Derzeitigebehandlung<br/>(248,83,331)<br/>k_XMISC_30<br/>Ginni_TRN: 78<br/>Ginni_VAL: 77<br/>Ginni_FT: 79</p>  | <p>Intercept:(-3.55,-10.02)<br/>k_30_28(0.47,3.39)<br/>k_30_34(7.63,11.23)<br/>k_30_37(-1.00,-6.71)<br/>k_20_26(-0.79,-3.39)<br/>k_20_27(-1.03,-2.29)<br/>k_20_29(-1.12,-4.01)<br/>k_5_35(-1.62,-6.20)<br/>k_2_2(-0.91,-2.24)<br/>k_2_34(-3.26,-4.63)</p>                                                                                                                                                                                                                                                                                              | <p>Intercept:(-3.94,-11.60)<br/>k_30_9(4.17,2.40)<br/>k_30_13(-0.86,-3.04)<br/>k_30_26(3.97,2.50)<br/>k_30_28(0.56,3.20)<br/>k_30_34(11.44,10.78)<br/>k_30_37(-1.22,-7.29)<br/>k_20_9(-3.80,-2.11)<br/>k_20_26(-6.65,-3.44)<br/>k_20_27(-1.45,-3.48)<br/>k_20_29(-1.18,-4.40)<br/>k_20_32(-0.90,-2.97)<br/>k_20_36(-0.47,-2.00)<br/>k_10_19(-1.18,-2.99)<br/>k_10_34(-3.98,-3.30)<br/>k_5_10(1.05,3.06)<br/>k_5_26(2.40,2.58)<br/>k_5_35(-1.48,-5.01)<br/>k_2_17(-1.10,-2.70)<br/>k_1_34(-2.19,-2.80)</p>                                                                                                                                                                   | <p>TRN:(100,79,76)<br/>VAL:(100,78,78)<br/>FT:(100,84,77)</p> | <p>TRN:(25,80,82)<br/>VAL:(31,81,81)<br/>FT:(19,78,85)</p> |
|  |  |  | <p>34. D,<br/>Derzeitigebehandlung<br/>(248,83,331)<br/>k_SBC_5<br/>Ginni_TRN: 75<br/>Ginni_VAL: 72<br/>Ginni_FT: 74</p>     | <p>Intercept:(-2.50,-9.47)<br/>k_5_29(-0.99,-3.31)<br/>k_5_32(3.06,2.57)<br/>k_5_34(7.64,9.55)<br/>k_2_28(0.62,4.64)<br/>k_2_35(-1.19,-5.52)<br/>k_1_32(-4.27,-3.17)<br/>k_1_34(-4.21,-5.19)<br/>k_1_37(0.83,-5.08)</p>                                                                                                                                                                                                                                                                                                                                | <p>Intercept:(-2.49,-11.08)<br/>k_5_29(-0.95,-3.96)<br/>k_5_34(6.99,10.64)<br/>k_2_28(0.57,5.14)<br/>k_1_32(-0.97,-3.09)<br/>k_1_34(-3.35,-5.11)<br/>k_1_35(-1.09,-5.57)<br/>k_1_37(-0.77,-5.84)</p>                                                                                                                                                                                                                                                                                                                                                                                                                                                                        | <p>TRN:(100,69,67)<br/>VAL:(100,82,82)<br/>FT:(100,65,65)</p> | <p>TRN:(9,79,82)<br/>VAL:(10,60,60)<br/>FT:(4,79,79)</p>   |

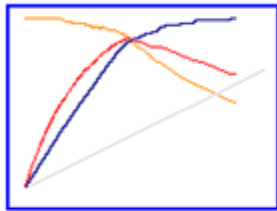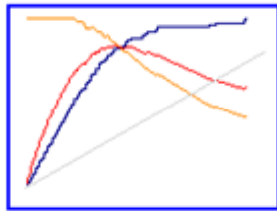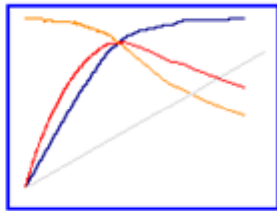

35. E. Ergebnisse  
(232,78,310)  
k\_XMISC\_40  
Ginni\_TRN: 82  
Ginni\_VAL: 80  
Ginni\_FT: 82

Intercept:(3.62,-7.71)  
k\_40\_28:(5.23,-2.89)  
k\_40\_35:(12.67,10.19)  
k\_30\_21:(-10.35,-3.83)  
k\_30\_29:(-3.01,-3.85)  
k\_20\_12:(2.45,-5.23)  
k\_20\_21:(9.22,3.35)  
k\_20\_28:(7.07,3.32)  
k\_20\_30:(-1.79,-3.56)  
k\_20\_31:(-0.82,-2.86)  
k\_10\_2:(-10.02,-3.94)  
k\_5\_2:(9.09,3.21)  
k\_5\_18:(2.03,-2.43)  
k\_5\_33:(2.52,4.09)  
k\_2\_3:(-1.40,-2.60)  
k\_2\_4:(-11.27,-2.14)  
k\_2\_28:(-3.13,-3.07)  
k\_2\_35:(-5.97,-5.74)  
k\_2\_38:(1.78,3.95)  
k\_1\_4:(13.16,2.43)  
k\_1\_29:(3.02,2.74)

Intercept:(3.28,-9.29)  
k\_40\_13:(-0.86,-2.98)  
k\_40\_21:(-3.59,-4.08)  
k\_40\_35:(11.35,11.83)  
k\_20\_6:(-0.58,-2.54)  
k\_20\_12:(-1.84,-5.60)  
k\_10\_2:(-8.01,-3.80)  
k\_10\_30:(-4.10,-3.88)  
k\_5\_2:(7.74,3.36)  
k\_5\_21:(2.85,2.87)  
k\_5\_33:(1.74,3.90)  
k\_2\_3:(-1.15,-2.58)  
k\_2\_28:(-0.75,-4.43)  
k\_2\_35:(-6.13,-7.30)  
k\_1\_4:(1.03,3.38)  
k\_1\_30:(2.90,2.28)  
k\_1\_38:(1.24,3.48)

TRN:(100,90,90)  
VAL:(100,86,78)  
FT:(100,84,82)

TRN:(34,87,87)  
VAL:(46,82,88)  
FT:(10,89,90)

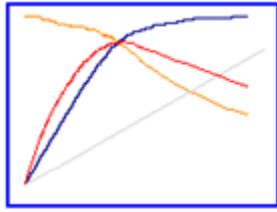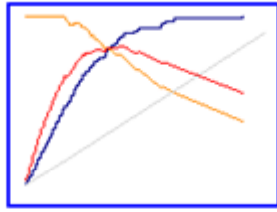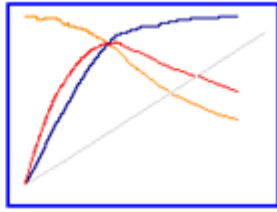

35. E. Ergebnisse  
(232,78,310)  
k\_SBC\_30  
Ginni\_TRN: 81  
Ginni\_VAL: 80  
Ginni\_FT: 81

Intercept:(2.84,-7.83)  
k\_30\_12:(-1.48,-4.27)  
k\_30\_21:(-8.41,-3.72)  
k\_30\_35:(9.29,9.88)  
k\_20\_21:(7.72,3.35)  
k\_20\_30:(2.06,-4.83)  
k\_5\_3:(-1.37,-3.00)  
k\_5\_16:(-1.71,-2.88)  
k\_5\_28:(-0.65,-4.02)  
k\_5\_33:(2.27,4.54)  
k\_2\_35:(-3.62,-4.23)  
k\_2\_38:(1.42,3.84)  
k\_1\_4:(1.09,3.78)

Intercept:(2.72,-9.18)  
k\_30\_21:(-3.03,-3.53)  
k\_30\_35:(8.93,11.70)  
k\_20\_12:(-1.47,-6.16)  
k\_10\_40:(0.80,3.88)  
k\_10\_28:(0.67,-5.12)  
k\_10\_30:(-3.72,-3.94)  
k\_5\_21:(2.79,2.87)  
k\_5\_34:(-1.35,-4.29)  
k\_2\_3:(-1.10,-2.77)  
k\_2\_35:(-4.52,-6.15)  
k\_1\_30:(2.78,2.43)

TRN:(100,83,81)  
VAL:(100,78,78)  
FT:(100,81,81)

TRN:(17,88,89)  
VAL:(46,88,88)  
FT:(10,89,89)

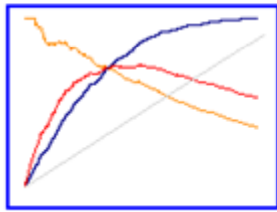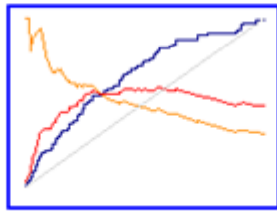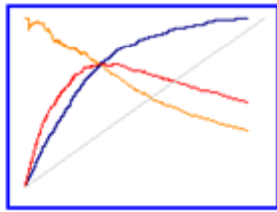

35. E. Ergebnisse  
(232,78,310)  
svd\_SBC\_40  
Ginni\_TRN: 76  
Ginni\_VAL: 66  
Ginni\_FT: 76

Intercept:(1.32,-10.32)  
s2:(4.94,4.96)  
s4:(10.95,7.05)  
s5:(-5.19,-4.73)  
s10:(-12.26,-7.55)  
s15:(7.34,4.66)  
s18:(12.94,7.96)  
s21:(-8.92,-5.95)  
s27:(-5.10,-3.30)  
s51:(-4.82,-2.91)  
s54:(-5.38,-3.45)  
s60:(4.67,2.83)  
s64:(4.61,2.91)  
s70:(-4.74,-2.82)  
s80:(5.47,3.24)  
s122:(-5.60,-3.08)  
s185:(-5.02,-2.69)  
s200:(7.26,-3.99)  
s233:(-1.95,-2.65)  
s240:(1.92,2.65)  
s382:(-2.58,-2.96)  
s384:(3.73,3.93)  
s401:(-2.32,-2.58)

Intercept:(-0.01,-0.02)  
s1:(-4.99,-3.08)  
s2:(4.05,4.67)  
s4:(7.34,5.75)  
s5:(-7.48,-7.06)  
s8:(3.40,2.76)  
s9:(7.35,-5.60)  
s10:(-11.90,-8.20)  
s13:(-4.29,-3.27)  
s15:(8.66,6.10)  
s18:(9.48,7.26)  
s21:(-6.37,-5.13)  
s48:(4.37,3.23)  
s51:(-4.74,-3.33)  
s64:(4.49,3.31)  
s73:(-4.99,-3.51)  
s80:(5.17,3.46)  
s94:(-3.99,-2.75)  
s122:(-4.98,-3.31)  
s143:(-4.16,-2.88)  
s212:(4.99,3.13)  
s217:(-3.98,-2.60)  
s298:(-1.85,-2.60)

TRN:(100,82,82)  
VAL:(100,46,60)  
FT:(100,72,66)

TRN:(12,86,86)  
VAL:(4,82,54)  
FT:(4,74,81)

s384:(3.73,3.93)  
s401:(-2.32,-2.58)

s217:(-3.98,-2.60)  
s298:(-1.85,-2.60)

|  |  |  |                                                                                                           |                                                                                                                                                                                                                                                                                                                                                                                      |                                                                                                                                                                                                                                                                                                                                                                        |                                                                  |                                                                  |
|--|--|--|-----------------------------------------------------------------------------------------------------------|--------------------------------------------------------------------------------------------------------------------------------------------------------------------------------------------------------------------------------------------------------------------------------------------------------------------------------------------------------------------------------------|------------------------------------------------------------------------------------------------------------------------------------------------------------------------------------------------------------------------------------------------------------------------------------------------------------------------------------------------------------------------|------------------------------------------------------------------|------------------------------------------------------------------|
|  |  |  | <p>36. G. Gefuehle<br/>(67,23,90)<br/>k_SBC_2<br/>Ginni_TRN: 93<br/>Ginni_VAL: 93<br/>Ginni_FT: 93</p>    | <p>Intercept(-5.74,-9.80)<br/>k_2_36(5.60,9.86)<br/>k_1_11(1.05,2.61)<br/>k_1_37(-1.80,-4.72)</p>                                                                                                                                                                                                                                                                                    | <p>Intercept(-5.50,-11.10)<br/>k_2_36(6.09,11.08)<br/>k_1_11(1.11,3.12)<br/>k_1_37(-2.21,-5.94)</p>                                                                                                                                                                                                                                                                    | <p>TRN:(100,78,58)<br/>VAL:(100,100,60)<br/>FT:(100,79,58)</p>   | <p>TRN:(24,73,91)<br/>VAL:(57,61,91)<br/>FT:(23,71,91)</p>       |
|  |  |  | <p>36. G. Gefuehle<br/>(67,23,90)<br/>svd_SBC_40<br/>Ginni_TRN: 92<br/>Ginni_VAL: 25<br/>Ginni_FT: 92</p> | <p>Intercept(-36232,-31.55)<br/>s2(-67452,-22.73)<br/>s5(98167,4,6.07)<br/>s6(77455,9,15.93)<br/>s13(-58221,-2.89)<br/>s15(76347,3,8.80)<br/>s16(77224,6,7.73)<br/>s31(74393,5,5.56)<br/>s34(30230,4,3.10)<br/>s36(-44618,.)<br/>s44(-17115,-2.07)<br/>s61(-45462,-7.43)<br/>s63(-101627,.)<br/>s79(-60764,-12.70)<br/>s88(-74700,.)<br/>s93(53627,4,4.56)<br/>s95(56000,7,7.00)</p> | <p>Intercept(-56754,-28.44)<br/>s2(-116316,-20.10)<br/>s3(106992,6,8.2)<br/>s4(-70473,.)<br/>s5(127819,36,93)<br/>s13(-150799,-6.31)<br/>s16(103850,.)<br/>s19(57125,.)<br/>s27(51642,3,5.76)<br/>s31(109156,8,72)<br/>s39(105519,.)<br/>s42(90367,9,8.52)<br/>s47(46447,9,.)<br/>s61(-86571,.)<br/>s63(-143344,-6.01)<br/>s69(119128,14,50)<br/>s79(45000,7,7.00)</p> | <p>TRN:(100,100,100)<br/>VAL:(17,17,17)<br/>FT:(100,100,100)</p> | <p>TRN:(100,100,100)<br/>VAL:(30,30,30)<br/>FT:(100,100,100)</p> |
|  |  |  | <p>36. G. Gefuehle<br/>(67,23,90)<br/>k_AIC_30<br/>Ginni_TRN: 95<br/>Ginni_VAL: 92<br/>Ginni_FT: 94</p>   | <p>Intercept(-11.54,-6.79)<br/>k_30_36(12.76,5.81)<br/>k_20_14(-0.63,-1.94)<br/>k_5_37(-2.32,-3.69)<br/>k_2_17(-4.06,-3.21)<br/>k_1_8(-5.35,-2.14)<br/>k_1_27(-4.67,-2.60)<br/>k_1_36(-6.20,-3.56)<br/>k_1_38(-1.57,-2.17)</p>                                                                                                                                                       | <p>Intercept(-8.38,-9.09)<br/>k_30_7(-4.08,-3.14)<br/>k_30_36(15.11,4.17)<br/>k_20_17(-2.30,-3.20)<br/>k_20_36(7.80,-2.24)<br/>k_20_38(-1.70,-3.81)<br/>k_5_27(-3.30,-2.96)<br/>k_1_7(4.32,2.67)<br/>k_1_11(1.18,2.71)<br/>k_1_37(-2.18,-3.81)</p>                                                                                                                     | <p>TRN:(100,89,67)<br/>VAL:(100,77,77)<br/>FT:(100,92,62)</p>    | <p>TRN:(67,85,99)<br/>VAL:(57,87,87)<br/>FT:(34,86,94)</p>       |

|                                                                                    |                                                                                    |                                                                                     |                                                                                                                   |                                                                                                                                                                                                                                                                                                                                                                                                                                                                                                                                                                                                                                                                       |                                                                                                                                                                                                                                                                                                                                                                                                                                                                   |                                                               |                                                             |
|------------------------------------------------------------------------------------|------------------------------------------------------------------------------------|-------------------------------------------------------------------------------------|-------------------------------------------------------------------------------------------------------------------|-----------------------------------------------------------------------------------------------------------------------------------------------------------------------------------------------------------------------------------------------------------------------------------------------------------------------------------------------------------------------------------------------------------------------------------------------------------------------------------------------------------------------------------------------------------------------------------------------------------------------------------------------------------------------|-------------------------------------------------------------------------------------------------------------------------------------------------------------------------------------------------------------------------------------------------------------------------------------------------------------------------------------------------------------------------------------------------------------------------------------------------------------------|---------------------------------------------------------------|-------------------------------------------------------------|
| 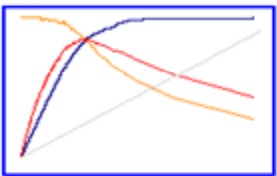  |   |   | <p>37. I, Interpretation<br/>(181,61,242)<br/>k_AIC_40<br/>Ginni_TRN: 85<br/>Ginni_VAL: 80<br/>Ginni_FT: 84</p>   | <p>Intercept:(4.91,-8.33)<br/>k_40_1:(-3.34,-3.92)<br/>k_40_12:(6.52,3.55)<br/>k_40_37:(20.04,7.39)<br/>k_30_13:(-1.06,-2.38)<br/>k_30_19:(-2.52,-2.59)<br/>k_30_28:(-0.62,-2.68)<br/>k_30_34:(-2.10,-5.80)<br/>k_20_6:(2.35,2.66)<br/>k_20_12:(-5.40,-2.32)<br/>k_20_37:(-15.77,-4.80)<br/>k_20_38:(-2.76,-6.31)<br/>k_10_30:(-5.80,-2.64)<br/>k_10_37:(11.68,4.31)<br/>k_5_5:(-1.21,-4.35)<br/>k_5_12:(-3.76,-2.55)<br/>k_5_14:(0.61,-1.97)<br/>k_5_25:(-0.99,-2.44)<br/>k_5_30:(5.82,2.49)<br/>k_5_37:(9.67,-5.39)<br/>k_2_6:(-4.52,-4.13)<br/>k_2_19:(8.89,3.36)<br/>k_2_31:(5.64,2.29)<br/>k_1_1:(3.22,3.15)<br/>k_1_19:(8.44,-3.31)<br/>k_1_31:(7.62,-2.95)</p> | <p>Intercept:(-4.65,-11.24)<br/>k_40_1:(-0.79,-3.93)<br/>k_40_37:(14.66,8.12)<br/>k_30_4:(-0.78,-2.91)<br/>k_30_34:(-1.94,-7.58)<br/>k_20_6:(2.11,3.11)<br/>k_20_28:(-0.87,-5.49)<br/>k_20_37:(-9.42,-4.37)<br/>k_20_38:(-2.00,-6.81)<br/>k_10_37:(6.39,3.45)<br/>k_5_5:(-0.56,-2.33)<br/>k_5_37:(-6.69,-5.22)<br/>k_2_6:(7.77,-3.62)<br/>k_2_12:(-1.28,-3.90)<br/>k_2_31:(5.18,2.93)<br/>k_1_6:(4.06,2.16)<br/>k_1_19:(-2.51,-3.67)<br/>k_1_31:(-6.52,-3.50)</p> | <p>TRN:(100,83,82)<br/>VAL:(100,78,75)<br/>FT:(100,88,67)</p> | <p>TRN:(31,86,87)<br/>VAL:(3,69,70)<br/>FT:(13,72,89)</p>   |
|   |   |   | <p>37. I, Interpretation<br/>(181,61,242)<br/>svd_SBC_40<br/>Ginni_TRN: 77<br/>Ginni_VAL: 28<br/>Ginni_FT: 74</p> | <p>Intercept:(-41080,-21.73)<br/>s3:(-155102,.)s4:(90452,.)<br/>s8:(-122292,.)s9:(81881,.)<br/>s10:(279114,.)<br/>s11:(-41124,.)<br/>s12:(142011,.)<br/>s15:(228358,.)<br/>s17:(-128679,.)<br/>s19:(104061,.)<br/>s20:(129830,.)<br/>s21:(132053,.)<br/>s26:(59498.3,.)</p>                                                                                                                                                                                                                                                                                                                                                                                           | <p>Intercept:(1.22,-12.86)<br/>s3:(-5.08,-3.56)<br/>s8:(-2.97,-3.14)<br/>s10:(7.25,6.54)<br/>s11:(-3.02,-2.86)<br/>s15:(5.62,4.72)<br/>s20:(3.82,3.27)<br/>s27:(-3.45,-2.84)<br/>s31:(-3.50,-2.86)<br/>s35:(-4.31,-3.30)<br/>s47:(-3.84,-2.96)<br/>s59:(-4.57,-3.37)</p>                                                                                                                                                                                          | <p>TRN:(100,99,99)<br/>VAL:(34,25,34)<br/>FT:(100,52,48)</p>  | <p>TRN:(99,100,10)<br/>VAL:(36,100,38)<br/>FT:(5,70,76)</p> |
|  |  |  | <p>37. I, Interpretation<br/>(181,61,242)<br/>k_AIC_40<br/>Ginni_TRN: 85<br/>Ginni_VAL: 80<br/>Ginni_FT: 84</p>   | <p>Intercept:(4.91,-8.33)<br/>k_40_1:(-3.34,-3.92)<br/>k_40_12:(6.52,3.55)<br/>k_40_37:(20.04,7.39)<br/>k_30_13:(-1.06,-2.38)<br/>k_30_19:(-2.52,-2.59)<br/>k_30_28:(-0.62,-2.68)<br/>k_30_34:(-2.10,-5.80)<br/>k_20_6:(2.35,2.66)<br/>k_20_12:(-5.40,-2.32)<br/>k_20_37:(-15.77,-4.80)<br/>k_20_38:(-2.76,-6.31)<br/>k_10_30:(-5.80,-2.64)<br/>k_10_37:(11.68,4.31)<br/>k_5_5:(-1.21,-4.35)<br/>k_5_12:(-3.76,-2.55)<br/>k_5_14:(0.61,-1.97)<br/>k_5_25:(-0.99,-2.44)<br/>k_5_30:(5.82,2.49)<br/>k_5_37:(9.67,-5.39)<br/>k_2_6:(-4.52,-4.13)<br/>k_2_19:(8.89,3.36)<br/>k_2_31:(5.64,2.29)<br/>k_1_1:(3.22,3.15)<br/>k_1_19:(8.44,-3.31)<br/>k_1_31:(7.62,-2.95)</p> | <p>Intercept:(-4.65,-11.24)<br/>k_40_1:(-0.79,-3.93)<br/>k_40_37:(14.66,8.12)<br/>k_30_4:(-0.78,-2.91)<br/>k_30_34:(-1.94,-7.58)<br/>k_20_6:(2.11,3.11)<br/>k_20_28:(-0.87,-5.49)<br/>k_20_37:(-9.42,-4.37)<br/>k_20_38:(-2.00,-6.81)<br/>k_10_37:(6.39,3.45)<br/>k_5_5:(-0.56,-2.33)<br/>k_5_37:(-6.69,-5.22)<br/>k_2_6:(7.77,-3.62)<br/>k_2_12:(-1.28,-3.90)<br/>k_2_31:(5.18,2.93)<br/>k_1_6:(4.06,2.16)<br/>k_1_19:(-2.51,-3.67)<br/>k_1_31:(-6.52,-3.50)</p> | <p>TRN:(100,83,82)<br/>VAL:(100,78,75)<br/>FT:(100,88,67)</p> | <p>TRN:(31,86,87)<br/>VAL:(3,69,70)<br/>FT:(13,72,89)</p>   |

|  |  |  |                                                                                                                    |                                                                                                                                                                                                                                                                                                                                                                                                                                                                                                                                                |                                                                                                                                                                                                                                                                                                                                                                                                                                                                                                                           |                                                               |                                                            |
|--|--|--|--------------------------------------------------------------------------------------------------------------------|------------------------------------------------------------------------------------------------------------------------------------------------------------------------------------------------------------------------------------------------------------------------------------------------------------------------------------------------------------------------------------------------------------------------------------------------------------------------------------------------------------------------------------------------|---------------------------------------------------------------------------------------------------------------------------------------------------------------------------------------------------------------------------------------------------------------------------------------------------------------------------------------------------------------------------------------------------------------------------------------------------------------------------------------------------------------------------|---------------------------------------------------------------|------------------------------------------------------------|
|  |  |  | <p>38. M. Moeglichkeiten<br/>(263,88,351)<br/>k_XMISC_40<br/>Ginni_TRN: 79<br/>Ginni_VAL: 77<br/>Ginni_FT: 79</p>  | <p>Intercept:(-2.86,-7.72)<br/>k_40_4:(0.80,-3.26)<br/>k_40_17:(-1.38,-4.01)<br/>k_40_19:(2.60,4.40)<br/>k_40_21:(0.60,-2.63)<br/>k_40_27:(1.93,2.62)<br/>k_40_38:(10.39,5.67)<br/>k_30_6:(0.66,2.71)<br/>k_30_15:(-0.73,-3.13)<br/>k_30_28:(-2.20,-3.51)<br/>k_30_37:(-1.88,-6.26)<br/>k_20_26:(3.02,3.78)<br/>k_20_38:(7.20,3.13)<br/>k_10_12:(-0.46,-1.56)<br/>k_10_36:(-1.53,-4.49)<br/>k_10_38:(6.02,-2.82)<br/>k_5_38:(6.18,-4.04)<br/>k_2_28:(2.07,2.96)<br/>k_1_19:(-3.01,-2.95)<br/>k_1_26:(-3.18,-3.02)<br/>k_1_27:(-4.18,-3.13)</p> | <p>Intercept:(-2.94,-8.92)<br/>k_40_5:(-0.44,-2.67)<br/>k_40_19:(3.32,6.18)<br/>k_40_21:(-4.10,-3.27)<br/>k_40_28:(-0.78,-6.14)<br/>k_40_35:(1.15,5.28)<br/>k_40_38:(14.38,11.73)<br/>k_30_6:(0.57,2.86)<br/>k_30_12:(-0.95,-3.86)<br/>k_30_36:(-1.35,-5.65)<br/>k_20_17:(-2.12,-5.53)<br/>k_20_21:(3.58,2.74)<br/>k_20_26:(2.33,3.50)<br/>k_20_37:(-1.92,-7.78)<br/>k_10_38:(4.05,-2.52)<br/>k_5_9:(-0.65,-2.68)<br/>k_5_38:(-5.03,-3.90)<br/>k_1_15:(-0.94,-4.11)<br/>k_1_19:(-3.33,-3.43)<br/>k_1_26:(-2.68,-2.92)</p> | <p>TRN:(100,84,82)<br/>VAL:(100,82,78)<br/>FT:(100,84,84)</p> | <p>TRN:(30,85,87)<br/>VAL:(30,81,84)<br/>FT:(18,83,83)</p> |
|  |  |  | <p>38. M. Moeglichkeiten<br/>(263,88,351)<br/>pe_SBC_40<br/>Ginni_TRN: 79<br/>Ginni_VAL: 75<br/>Ginni_FT: 78</p>   | <p>Intercept:(-1.43,-8.93)<br/>pC_8_3:(1.16,2.59)<br/>pC_11_2:(1.88,3.74)<br/>pC_14_2:(1.82,3.16)<br/>pC_14_6:(10.64,3.58)<br/>pC_15_1:(-0.26,-3.48)<br/>pC_17_1:(-0.28,-4.38)<br/>pC_19_1:(0.31,4.28)<br/>pC_19_2:(-1.03,-4.00)<br/>pC_25_5:(-4.05,-2.75)<br/>pC_27_2:(-1.24,-4.36)<br/>pC_27_4:(3.01,4.20)<br/>pC_28_1:(-0.17,-2.81)<br/>pC_28_2:(2.29,3.07)<br/>pC_35_5:(5.89,2.71)<br/>pC_36_1:(-0.46,-5.72)<br/>pC_37_1:(-0.92,-7.01)<br/>pC_38_1:(2.70,11.68)<br/>pC_38_2:(-7.53,-9.84)<br/>pC_38_3:(10.34,6.70)</p>                     | <p>Intercept:(-1.19,-9.90)<br/>pC_15_1:(-0.31,-5.19)<br/>pC_17_1:(-0.26,-4.75)<br/>pC_19_1:(0.40,6.15)<br/>pC_19_2:(-1.04,-4.81)<br/>pC_22_2:(-1.02,-3.25)<br/>pC_24_5:(-7.54,-3.79)<br/>pC_27_2:(-0.65,-3.03)<br/>pC_27_4:(2.65,4.60)<br/>pC_28_1:(-0.18,-3.47)<br/>pC_32_4:(-2.45,-2.70)<br/>pC_33_7:(-8.49,-2.81)<br/>pC_36_1:(-0.34,-5.34)<br/>pC_37_1:(-0.77,-7.96)<br/>pC_38_1:(-7.43,8.84)<br/>pC_38_2:(-6.26,-11.26)<br/>pC_38_3:(10.00,8.17)</p>                                                                 | <p>TRN:(100,82,79)<br/>VAL:(100,69,62)<br/>FT:(100,79,76)</p> | <p>TRN:(23,86,89)<br/>VAL:(41,81,92)<br/>FT:(18,88,91)</p> |
|  |  |  | <p>38. M. Moeglichkeiten<br/>(263,88,351)<br/>pe_XMISC_40<br/>Ginni_TRN: 80<br/>Ginni_VAL: 74<br/>Ginni_FT: 79</p> | <p>Intercept:(-1.70,-8.75)<br/>pC_6_1:(0.24,2.48)<br/>pC_8_3:(2.12,3.91)<br/>pC_8_4:(1.98,2.56)<br/>pC_8_6:(-3.24,-2.72)<br/>pC_10_2:(1.47,3.46)<br/>pC_11_2:(1.78,3.06)<br/>pC_14_2:(1.83,2.80)<br/>pC_14_6:(15.74,4.65)<br/>pC_14_7:(-17.76,-3.20)<br/>pC_15_1:(-0.44,-4.65)<br/>pC_17_1:(-0.38,-4.69)<br/>pC_19_1:(0.52,5.86)<br/>pC_19_2:(-1.39,-4.37)<br/>pC_22_2:(-1.71,-3.65)<br/>pC_24_5:(-8.14,-2.86)</p>                                                                                                                             | <p>Intercept:(-1.24,-9.72)<br/>pC_5_2:(1.51,2.91)<br/>pC_5_6:(7.17,2.67)<br/>pC_6_1:(0.20,2.96)<br/>pC_8_4:(1.16,2.04)<br/>pC_14_7:(-11.45,-2.72)<br/>pC_15_1:(-0.34,-5.42)<br/>pC_17_1:(-0.32,-4.95)<br/>pC_19_1:(0.36,5.26)<br/>pC_19_2:(-1.06,-4.48)<br/>pC_22_2:(-1.12,-3.22)<br/>pC_24_5:(-7.20,-3.39)<br/>pC_26_1:(0.18,2.79)<br/>pC_26_2:(-0.98,-3.07)<br/>pC_27_2:(-0.64,-2.75)<br/>pC_27_4:(2.29,3.66)</p>                                                                                                       | <p>TRN:(100,88,84)<br/>VAL:(100,84,84)<br/>FT:(100,77,75)</p> | <p>TRN:(35,85,89)<br/>VAL:(30,67,67)<br/>FT:(18,92,94)</p> |
